# Supplementary material for: Deeply Recycled Origins of Mantle Heterogeneity at the Northern East Pacific Rise
Source: Research Square preprint supplement (doi:10.21203/rs.3.rs-6173319/v1), 2025-06-20
Supplement: Supplementary file 1 [file 024bc98f97ef94b14c7e00f7.xlsx]

## Sheet: Sheet1
Sample	Latitude	Longitude	Depth	Cruise Year	Seamount	Lava Type	Major Elements	SiO2	TiO2	Al2O3	Cr2O3	FeO	MnO	MgO	CaO	Na2O	K2O	P2O5	MgNumber	3He/4He	2σ	4He	3He	εNd	143Nd/144Nd	2σ	87Sr/86Sr	2σ	208Pb/204Pb	2σ	207Pb/204Pb	2σ	206Pb/204Pb	2σ	208Pb/206Pb	2σ	207Pb/206Pb	2σ	Li	Sc	V	Cr	Co	Ni	Cu	Zn	Ga	Rb	Sr
			mbsl				lab	wt %	wt %	wt %	wt %	wt %	wt %	wt %	wt %	wt %	wt %	wt %		R/RA		cm3STP/g	cm3STP/g																ppm	ppm	ppm	ppm	ppm	ppm	ppm	ppm	ppm	ppm	ppm
OS11_A	8.44457	-104.286	2947	2016	Oscar	NMORB	USGS	48.173	1.06159	17.566	0.0424309	8.53228	0.149113	9.32796	11.9831	2.81918	0.0947845	0.10183	66.0875	-	-	-	-	-	-	-	-	-	-	-	-	-	-	-	-	-	-	-	-	-	-	-	-	-	-	-	-	-	-
OS11_B	8.44457	-104.286	2947	2016	Oscar	NMORB	USGS	48.2115	1.07277	17.5575	0.037424	8.50543	0.145184	9.33359	11.9905	2.84615	0.0949679	0.095565	66.1716	-	-	-	-	-	-	-	-	-	-	-	-	-	-	-	-	-	-	-	4.38935	33.0549	166.886	252.765	42.5841	158.82	72.6686	61.1092	12.6685	1.10847	161.632
OS11_C	8.44457	-104.286	2947	2016	Oscar	NMORB	USGS	47.8083	1.06648	17.5429	0.0417989	8.46796	0.153277	9.37469	12.0082	2.80568	0.0902836	0.101404	66.3685	-	-	-	-	-	-	-	-	-	-	-	-	-	-	-	-	-	-	-	4.44053	31.9442	168.139	255.47	43.2236	161.747	73.1169	63.3305	12.8534	1.19538	161.695
OS11_D	8.44457	-104.286	2947	2016	Oscar	NMORB	USGS	48.4024	1.12785	17.1717	0.0427149	8.47041	0.139141	9.0982	12.0617	2.84187	0.136315	0.110783	65.6906	-	-	-	-	-	-	-	-	-	-	-	-	-	-	-	-	-	-	-	4.70803	31.8644	179.069	285.171	42.4613	139.367	73.3342	64.2333	13.2043	1.61847	166.692
OS11_E	8.44457	-104.286	2947	2016	Oscar	NMORB	USGS	48.0016	1.06118	17.5654	0.0435407	8.51603	0.142679	9.24434	12.0078	2.84171	0.0915516	0.093088	65.9282	-	-	-	-	-	-	-	-	-	-	-	-	-	-	-	-	-	-	-	-	-	-	-	-	-	-	-	-	-	-
OS11_F	8.44457	-104.286	2947	2016	Oscar	NMORB	USGS	48.1383	1.12882	17.0048	0.0507887	8.39762	0.1471	9.17019	12.0579	2.87791	0.125942	0.108676	66.0617	-	-	-	-	-	-	-	-	-	-	-	-	-	-	-	-	-	-	-	-	-	-	-	-	-	-	-	-	-	-
OS11_G	8.44457	-104.286	2947	2016	Oscar	NMORB	USGS	47.6149	1.06248	17.2278	0.040426	8.40058	0.142437	9.40489	11.939	2.89494	0.0963212	0.0927913	66.6182	-	-	-	-	-	-	-	-	-	-	-	-	-	-	-	-	-	-	-	-	-	-	-	-	-	-	-	-	-	-
5002_2	8.35967	-104.377	2765	2018	Oscar	NMORB	UF	51.1546	1.58915	14.4819	-	10.34	0.190857	7.2747	11.9178	2.89875	0.18	0.153	55.6365	-	-	-	-	9.38284	0.513119	7.1e-06	0.702614	9e-06	37.9545	0.00313	15.5078	0.00127	18.4504	0.0015	2.05708	3e-05	0.84051	1e-05	7.06	46.8	335	293	47.7	75.9	94.3	90.3	20.9	1.41	153
5002_6	8.36233	-104.378	2748	2018	Oscar	NMORB	UF	51.0763	1.53244	14.6294	-	10.1844	0.206039	7.34833	11.991	2.84417	0.169286	0.141	56.2584	-	-	-	-	-	-	-	-	-	-	-	-	-	-	-	-	-	-	-	-	-	-	-	-	-	-	-	-	-	-
5002_12	8.36917	-104.383	2752	2018	Oscar	EMORB	UF	48.8905	1.95677	16.9506	-	8.99262	0.167	7.5733	10.449	3.10025	0.711429	0.33	60.0191	-	-	-	-	-	-	-	-	-	-	-	-	-	-	-	-	-	-	-	-	-	-	-	-	-	-	-	-	-	-
5002_14	8.36967	-104.385	2717	2018	Oscar	EMORB	UF	48.8304	1.93051	16.7211	-	9.08286	0.169169	8.07334	10.3585	3.07401	0.687857	0.342	61.3065	8.167	0.079	3.454e-06	3.92103e-11	7.2956	0.513012	5.7e-06	0.702765	1.5e-05	38.12	0.00181	15.5396	0.00063	18.6735	0.00073	2.04148	3e-05	0.83221	1e-05	7.14	35.4	271	481	49.3	184	64.5	90.3	22.7	14.6	408
5002_18	8.37017	-104.391	2696	2018	Oscar	EMORB	UF	48.808	1.91266	16.7805	-	9.07456	0.161578	8.07846	10.3402	3.1034	0.695357	0.342	61.3432	-	-	-	-	-	-	-	-	-	-	-	-	-	-	-	-	-	-	-	-	-	-	-	-	-	-	-	-	-	-
5002_19	8.371	-104.392	2685	2018	Oscar	EMORB	UF	49.1438	1.92841	16.7652	-	9.07145	0.164831	8.07334	10.3758	3.0971	0.706071	0.332	61.3363	8.225	0.066	1.854e-06	2.11963e-11	7.78327	0.513037	1.1e-05	0.702899	1.9e-05	38.1179	0.00276	15.5389	0.00105	18.6714	0.00124	2.04151	4e-05	0.83224	1e-05	6.17	30.8	232	236	38.2	140	57.5	84.3	19.3	12.4	346
5002_20	8.37133	-104.391	2686	2018	Oscar	EMORB	UF	48.7877	1.95047	16.7508	-	9.05796	0.162662	8.09482	10.2944	3.09291	0.699643	0.324	61.4346	-	-	-	-	-	-	-	-	-	-	-	-	-	-	-	-	-	-	-	5.47	24.9	214	216	35.7	137	54.5	73.2	18.4	6.34	315
5002_21	8.37117	-104.394	2710	2018	Oscar	EMORB	UF	49.3037	1.94545	16.9731	-	8.96726	0.160253	7.48422	10.4669	3.14387	0.70119	0.33	59.8027	-	-	-	-	7.45165	0.51302	5.3e-06	0.702886	1.6e-05	38.1141	0.00318	15.5368	0.00117	18.6704	0.00135	2.04134	3e-05	0.83215	1e-05	5.83	28.2	210	207	34.7	109	51.5	69.6	17.9	11.8	318
5002_v	-	-	-	2018	Oscar	EMORB	UF	49.2527	1.90635	16.6771	-	9.0953	0.163747	8.0713	10.3148	3.06457	0.685714	0.32	61.268	-	-	-	-	-	-	-	-	-	-	-	-	-	-	-	-	-	-	-	-	-	-	-	-	-	-	-	-	-	-
4854_1	8.4081	-104.414	2478	2016	Oscar	DMORB	UF	47.5727	0.938	18.1462	-	8.584	0.154	9.76028	11.7845	2.43152	0.06324	0.08	66.9618	-	-	-	-	-	-	-	-	-	-	-	-	-	-	-	-	-	-	-	3.77814	30.0929	162.784	210.039	47.9963	153.433	101.452	61.5548	12.4026	0.500033	135.976
4854_2	8.40922	-104.412	2444	2016	Oscar	EMORB	UF	49.0081	2.19714	16.4213	-	8.94571	0.157143	6.75827	10.4003	3.29086	0.950057	0.421429	57.3863	-	-	-	-	-	-	-	-	-	-	-	-	-	-	-	-	-	-	-	6.41126	32.2838	255.071	207.409	37.3969	67.0449	71.3149	87.6614	21.5975	19.3391	353.743
4854_3	8.40924	-104.412	2440	2016	Oscar	EMORB	UF	48.4712	2.20167	16.3009	-	8.88833	0.14	6.7465	10.2947	3.3176	0.9418	0.425	57.501	-	-	-	-	-	-	-	-	-	-	-	-	-	-	-	-	-	-	-	5.8661	30.042	242.017	193.004	35.1252	62.2136	63.4159	87.1602	20.7319	18.3903	352.088
4854_4	8.40945	-104.412	2388	2016	Oscar	EMORB	UF	48.4611	2.1925	16.2603	-	8.91	0.1525	6.71817	10.3871	3.3124	0.9333	0.4375	57.3386	8.201	0.075	5.421e-06	6.17961e-11	7.27609	0.513011	1e-05	0.702897	1.9e-05	37.8936	0.00921	15.4973	0.003	18.5552	0.00262	2.04228	0.00023	0.83523	5e-05	5.587	30.8627	236.197	189.346	34.1855	61.1039	59.1494	83.7014	19.8118	17.711	353.401
4854_5	8.41049	-104.411	2434	2016	Oscar	EMORB	UF	48.6279	2.182	16.2928	-	8.948	0.152	6.70942	10.3966	3.23232	0.94452	0.44	57.2025	-	-	-	-	-	-	-	-	-	-	-	-	-	-	-	-	-	-	-	5.5735	30.805	237.146	189.65	34.1097	59.3158	62.0191	86.0737	20.0915	17.7045	348.064
4854_6	8.41381	-104.408	2430	2016	Oscar	DMORB	UF	48.2018	1.066	17.8133	-	9.172	0.156	9.2391	10.778	2.6624	0.07344	0.08	64.2292	9.195	0.051	1.845e-05	2.3581e-10	9.20728	0.51311	3.8e-06	0.702763	1.6e-05	37.0069	0.0192	15.47	0.0061	17.5017	0.00466	2.11447	0.000534	0.883912	0.000114	4.29649	32.412	161.573	268.985	47.6126	147.115	81.4408	72.3306	13.8961	0.430939	194.759
4854_7	8.40854	-104.408	2436	2016	Oscar	NMORB	UF	49.5003	1.502	14.7906	-	9.41	0.176	7.63848	11.427	2.90784	0.24684	0.178	59.1329	-	-	-	-	-	-	-	-	-	-	-	-	-	-	-	-	-	-	-	4.99689	40.8976	261.22	145.356	39.9888	44.4014	74.2602	76.2422	13.7808	2.28162	186.666
4854_8	8.40502	-104.406	2469	2016	Oscar	NMORB	UF	50.0389	1.534	14.7073	-	9.508	0.164	7.45102	11.5329	2.9952	0.25296	0.184	58.2794	-	-	-	-	8.79763	0.513089	9.6e-06	0.702457	1.8e-05	38.0335	0.00304	15.5202	0.00124	18.5625	0.00143	2.04878	4e-05	0.83608	1e-05	5.61455	42.4301	275.145	138.668	36.5936	53.8683	70.4632	73.0469	17.0241	2.25523	187.409
4854_9	8.40452	-104.398	2535	2016	Oscar	DMORB	UF	48.039	1.08	17.3362	-	9.866	0.164	8.88066	11.0376	2.65616	0.07344	0.076	61.605	-	-	-	-	-	-	-	-	-	-	-	-	-	-	-	-	-	-	-	4.3548	40.8557	167.718	220.838	46.1669	99.5267	96.548	71.7425	13.1114	0.639036	151.273
4854_11	8.40406	-104.395	2418	2016	Oscar	NMORB	UF	47.4561	0.904	18.1015	-	9.198	0.144	9.6305	11.0196	2.54592	0.06324	0.074	65.1124	-	-	-	-	-	-	-	-	-	-	-	-	-	-	-	-	-	-	-	3.73869	29.169	145.702	204.818	46.5609	141.212	86.4109	66.2481	12.4098	0.591671	144.595
4854_13	8.40394	-104.394	2319	2016	Oscar	NMORB	UF	47.6249	0.95	18.0934	-	9.11	0.162	9.61814	10.9917	2.53344	0.06528	0.08	65.3014	8.26774	0.0782396	1.66459e-06	1.91298e-11	8.29045	0.513063	8e-06	0.702647	1.3e-05	37.8667	0.009	15.5348	0.00317	18.4253	0.00331	2.05519	0.00016	0.84305	4e-05	4.0073	31.9614	152.825	212.828	48.2074	143.24	89.2518	67.9824	12.9734	0.5627	151.218
5005_2A	8.4028	-104.404	2448	2018	Oscar	DMORB	UF	47.4205	1.18819	17.6305	-	8.91341	0.170758	8.85477	11.336	2.91865	0.0756364	0.107729	63.9095	8.25376	0.125114	3.96507e-07	4.54902e-12	-	-	-	-	-	-	-	-	-	-	-	-	-	-	-	5.71	39.2	340	171	46.3	67.5	87	85.6	20.6	1.11	205
5005_2B	8.4028	-104.404	2448	2018	Oscar	NMORB	UF	51.6158	1.5334	14.8018	-	9.2962	0.167818	7.55383	11.4698	3.00515	0.255325	0.19505	59.1576	-	-	-	-	-	-	-	-	-	-	-	-	-	-	-	-	-	-	-	5.86	42.8	293	150	39.6	57.8	75.4	77.3	18	1.99	194
5005_3	8.4052	-104.404	2448	2018	Oscar	DMORB	UF	49.8163	1.32754	15.0704	-	9.39819	0.173939	8.05081	12.0362	2.84569	0.0882424	0.115271	60.4271	8.14971	0.0557583	2.37848e-05	2.69436e-10	-	-	-	-	-	-	-	-	-	-	-	-	-	-	-	5.66	40.8	267	163	40.9	60.7	71.1	72.6	17.1	1.97	182
5005_4	8.4069	-104.404	2431	2018	Oscar	NMORB	UF	49.5196	1.44804	15.3945	-	9.17515	0.169697	7.56924	11.371	3.06241	0.216404	0.182063	59.523	-	-	-	-	-	-	-	-	-	-	-	-	-	-	-	-	-	-	-	5.61	39.4	306	175	44.8	86.4	84.3	81.5	19.3	1.16	191
5005_6	8.4071	-104.404	2422	2018	Oscar	NMORB	UF	49.9202	1.46585	15.2579	-	9.14358	0.15803	7.5662	11.3981	3.0831	0.222707	0.179908	59.5964	-	-	-	-	-	-	-	-	-	-	-	-	-	-	-	-	-	-	-	-	-	-	-	-	-	-	-	-	-	-
5005_7	8.4081	-104.404	2426	2018	Oscar	DMORB	UF	49.9642	1.36841	15.0449	-	9.42263	0.165455	7.9626	12.1154	2.75856	0.095596	0.132507	60.1011	-	-	-	-	-	-	-	-	-	-	-	-	-	-	-	-	-	-	-	5.4	39.7	256	152	37.2	67.6	71.2	76.3	16.8	1.94	181
5005_8	8.4091	-104.405	2451	2018	Oscar	EMORB	UF	51.3454	1.55798	14.7606	-	9.42893	0.173776	7.46979	11.5007	3.02172	0.26592	0.19505	58.5434	-	-	-	-	-	-	-	-	-	-	-	-	-	-	-	-	-	-	-	5.79	42.8	280	141	36.8	54.4	71.8	74.8	17.4	2.29	190
5005_10	8.4107	-104.405	2477	2018	Oscar	DMORB	UF	47.923	1.24581	17.3818	-	9.14867	0.164394	8.58307	11.3119	3.06132	0.0819394	0.101266	62.5795	-	-	-	-	9.65594	0.513133	5.8e-06	0.702417	1.3e-05	37.9911	0.00294	15.5078	0.0012	18.6678	0.00146	2.03516	3e-05	0.83073	1e-05	4.61	31.6	175	240	46.6	185	80.4	60.8	15.7	0.37	172
5005_12	8.4116	-104.404	2467	2018	Oscar	EMORB	UF	49.7873	1.47808	14.5625	-	9.23744	0.166825	7.7093	11.3443	3.02069	0.238374	0.17988	59.8014	-	-	-	-	9.2853	0.513114	5.1e-06	0.702541	1e-05	37.9595	0.00209	15.5115	0.00076	18.5058	0.00084	2.05125	4e-05	0.83821	1e-05	5.33	38.3	266	154	39	73.8	72.8	72.7	16.9	1.49	176
5005_13	8.4121	-104.403	2511	2018	Oscar	DMORB	UF	49.8852	1.31287	15.1417	-	9.38087	0.177121	8.10454	12.0924	2.74332	0.0892929	0.126043	60.6301	8.35822	0.0680396	6.9242e-06	8.04447e-11	9.16826	0.513108	2.7e-06	0.702523	1.4e-05	38.037	0.00315	15.5182	0.00129	18.6324	0.00158	2.04145	3e-05	0.83289	1e-05	5.32	43.2	196	299	52.2	185	94.1	70.2	17.9	1.01	187
5005_14	8.4117	-104.399	2489	2018	Oscar	NMORB	UF	50.2919	1.52767	15.0102	-	9.2444	0.171818	7.39587	11.4512	3.05914	0.241616	0.191758	58.7815	-	-	-	-	-	-	-	-	-	-	-	-	-	-	-	-	-	-	-	4.62	30.8	172	259	45.9	182	78.9	58.9	15.6	0.34	174
5005_15	8.4107	-104.396	2497	2018	Oscar	NMORB	UF	47.5428	1.06779	17.3582	-	8.92896	0.156198	8.82399	11.3164	2.68104	0.116511	0.107729	63.7888	-	-	-	-	-	-	-	-	-	-	-	-	-	-	-	-	-	-	-	5.33	39.1	253	327	40.1	73	85.7	73.5	16.4	0.59	118
5005_16	8.41	-104.395	2502	2018	Oscar	NMORB	UF	50.0761	1.4868	15.1774	-	9.32486	0.168636	7.52362	11.5123	3.09181	0.224808	0.180986	58.9863	-	-	-	-	9.71446	0.513136	4.6e-06	0.702612	1.1e-05	37.8857	0.00302	15.4991	0.00121	18.3782	0.00135	2.06146	4e-05	0.84335	1e-05	6.11	44	275	383	46.5	78.3	93.3	77.2	18.7	0.53	131
OS12_B	8.44354	-104.473	2961	2016	Hook Ridge	NMORB	USGS	49.7854	1.31002	15.996	-	8.53255	-	8.27833	12.1845	2.92439	0.207536	0.152527	63.3623	-	-	-	-	-	-	-	-	-	-	-	-	-	-	-	-	-	-	-	5.20421	40.2475	210.104	372.66	51.534	186.068	74.8503	78.2174	15.131	1.69797	171.918
OS12_D	8.44354	-104.473	2961	2016	Hook Ridge	NMORB	USGS	47.9461	1.11436	17.118	-	8.97399	-	9.85744	11.5021	2.70036	0.117611	0.105674	66.1936	-	-	-	-	-	-	-	-	-	-	-	-	-	-	-	-	-	-	-	-	-	-	-	-	-	-	-	-	-	-
OS12_E	8.44354	-104.473	2961	2016	Hook Ridge	NMORB	USGS	48.1112	1.12139	17.066	-	8.98548	-	9.83839	11.5576	2.74499	0.114091	0.102963	66.1216	-	-	-	-	-	-	-	-	-	-	-	-	-	-	-	-	-	-	-	-	-	-	-	-	-	-	-	-	-	-
OS12_F	8.44354	-104.473	2961	2016	Hook Ridge	NMORB	USGS	48.0125	1.10944	17.0481	-	8.91721	-	9.87278	11.5834	2.7058	0.117758	0.109623	66.3702	8.238	0.082	4.534e-06	5.1918e-11	9.38284	0.513119	1e-05	0.702669	2.1e-05	37.6753	0.00648	15.4922	0.00233	18.1727	0.00215	2.07308	0.00021	0.85248	4e-05	4.6815	33.5463	181.922	329.925	45.9307	176.736	66.5031	67.9729	12.9446	1.476	146.006
OS12_G	8.44354	-104.473	2961	2016	Hook Ridge	NMORB	USGS	48.5179	1.1245	17.9987	-	8.47626	-	9.0487	11.5953	2.91671	0.128279	0.102722	65.5519	-	-	-	-	-	-	-	-	-	-	-	-	-	-	-	-	-	-	-	-	-	-	-	-	-	-	-	-	-	-
OS12_H	8.44354	-104.473	2961	2016	Hook Ridge	NMORB	USGS	48.0612	1.07075	17.7225	-	8.43302	-	9.2977	11.7878	2.74122	0.0988445	0.100269	66.2767	-	-	-	-	-	-	-	-	-	-	-	-	-	-	-	-	-	-	-	-	-	-	-	-	-	-	-	-	-	-
OS12_I	8.44354	-104.473	2961	2016	Hook Ridge	NMORB	USGS	47.9633	1.11203	17.0973	-	9.00429	-	9.83619	11.4668	2.64506	0.116876	0.109413	66.0697	-	-	-	-	-	-	-	-	-	-	-	-	-	-	-	-	-	-	-	-	-	-	-	-	-	-	-	-	-	-
4855_1	8.3528	-104.491	2940	2016	Hook Ridge	EMORB	UF	48.9864	2.16182	16.5851	-	9.76091	0.16	7.25869	9.73463	3.39229	0.798382	0.399091	57	-	-	-	-	-	-	-	-	-	-	-	-	-	-	-	-	-	-	-	6.98941	30.0449	260.668	212.387	41.2422	94.6629	55.4065	96.2028	24.468	13.857	381.955
4855_2	8.35626	-104.489	2883	2016	Hook Ridge	EMORB	UF	48.8292	2.12625	16.2996	-	9.78125	0.1575	7.57308	9.60324	3.3787	0.801975	0.40625	57.9853	8.135	0.057	2.212e-06	2.50125e-11	6.96398	0.512995	6e-06	0.702841	1.3e-05	37.9168	0.0211	15.4994	0.00655	18.6276	0.00513	2.03571	0.00056	0.83215	0.00012	6.843	31.5879	257.815	220.206	42.2565	107.301	54.9497	93.3486	24.1309	13.902	385.384
4855_3	8.35736	-104.49	2825	2016	Hook Ridge	EMORB	UF	49.415	2.27333	16.569	-	9.38083	0.151667	6.43664	9.63319	3.56113	0.9758	0.47	55.0174	-	-	-	-	7.39313	0.513017	7.4e-06	0.702883	1.7e-05	38.0504	0.00217	15.5275	0.000856	18.6363	0.000911	2.0416	4.1e-05	0.833184	1.36e-05	6.91661	29.4975	258.596	238.645	34.9373	59.4979	52.3753	89.0593	25.6388	17.5524	390.367
OS13_A	8.41004	-104.586	2500	2016	Midway Ridge	DMORB	UF	47.9968	1.038	17.5057	-	10.062	0.189	9.55016	11.0366	2.6104	0.05202	0.091	62.851	7.205	0.053	1.413e-05	1.41511e-10	8.32946	0.513065	5.9e-06	0.702602	1.6e-05	37.8463	0.00454	15.4936	0.00181	18.2881	0.00202	2.0694	6.31e-05	0.84719	1.93e-05	6.14438	61.1432	295.724	480.111	72.6137	329.43	107.358	88.0222	22.5291	0.4244	232.105
OS13_B	8.41004	-104.586	2500	2016	Midway Ridge	DMORB	UF	47.9214	1.043	17.3565	-	10.101	0.195	9.62844	11.0815	2.64576	0.05508	0.093	62.9512	-	-	-	-	-	-	-	-	-	-	-	-	-	-	-	-	-	-	-	-	-	-	-	-	-	-	-	-	-	-
OS13_C	8.41004	-104.586	2500	2016	Midway Ridge	DMORB	UF	48.0001	1.03625	17.373	-	10.0725	0.17875	9.47729	10.9537	2.6143	0.057375	0.0925	62.6475	7.18476	0.0562205	1.21911e-05	1.2175e-10	-	-	-	-	-	-	-	-	-	-	-	-	-	-	-	4.58167	43.4998	215.191	291.435	53.5459	158.387	91.3533	68.4176	11.7672	0.355839	178.435
OS13_D	8.41004	-104.586	2500	2016	Midway Ridge	DMORB	UF	47.9273	1.02111	17.3249	-	10.0922	0.19	9.55268	10.987	2.60924	0.0623333	0.0977778	62.7871	-	-	-	-	-	-	-	-	-	-	-	-	-	-	-	-	-	-	-	4.54318	42.8357	210.186	294.873	57.0312	203.955	88.5894	68.9224	11.4655	0.351512	175.536
OS13_E	8.41004	-104.586	2500	2016	Midway Ridge	DMORB	UF	47.9244	1.023	17.4133	-	10.065	0.178	9.62535	11.0276	2.64264	0.05916	0.09	63.0269	7.1889	0.059152	1.03921e-05	1.03844e-10	8.19292	0.513058	6e-06	0.702593	2.1e-05	37.8791	0.00677	15.5155	0.00268	18.2896	0.00305	2.07112	5e-05	0.84833	3e-05	4.3227	43.8395	202.72	277.083	51.1874	155.007	85.2657	66.177	11.0889	0.3338	177.34
OS13_F	8.41004	-104.586	2500	2016	Midway Ridge	DMORB	UF	47.7457	1.04909	17.2947	-	10.0336	0.18	9.45727	11.1698	2.62269	0.0584182	0.0909091	62.6885	-	-	-	-	-	-	-	-	-	-	-	-	-	-	-	-	-	-	-	-	-	-	-	-	-	-	-	-	-	-
OS13_G	8.41004	-104.586	2500	2016	Midway Ridge	DMORB	UF	47.9363	1.05333	17.3869	-	10.0767	0.182222	9.55611	11.22	2.60462	0.0555333	0.0866667	62.8315	-	-	-	-	-	-	-	-	-	-	-	-	-	-	-	-	-	-	-	-	-	-	-	-	-	-	-	-	-	-
OS13_H	8.41004	-104.586	2500	2016	Midway Ridge	DMORB	UF	48.207	1.04286	17.7204	-	10	0.181429	9.05076	11.2476	2.65794	0.0539143	0.0942857	61.7346	-	-	-	-	-	-	-	-	-	-	-	-	-	-	-	-	-	-	-	4.64656	42.273	216.096	294.104	54.0066	159.597	89.9203	71.9382	11.9024	0.358648	179.33
OS9_A	8.41618	-104.645	2800	2016	Beryl	NMORB	USGS	48.3371	1.32002	17.2456	0.0324023	9.02989	0.163932	8.23093	11.517	2.99629	0.211775	0.141691	61.9021	-	-	-	-	8.427	0.51307	6e-06	0.702818	1.7e-05	37.9846	0.00646	15.5097	0.00201	18.5675	0.00175	2.0456	0.00018	0.83528	4e-05	4.4697	32.1226	199.533	232.873	39.7751	122.424	68.7467	72.1841	13.2723	3.934	219.259
OS9_B	8.41618	-104.645	2800	2016	Beryl	EMORB	USGS	48.4378	1.32811	17.0653	0.0417683	9.06771	0.156959	8.62278	11.506	3.00664	0.226272	0.158734	62.8952	-	-	-	-	-	-	-	-	-	-	-	-	-	-	-	-	-	-	-	4.35263	34.3539	199.814	245.776	40.5783	133.587	67.2816	72.2811	13.1158	3.8569	217.207
OS9_C	8.41618	-104.645	2800	2016	Beryl	EMORB	USGS	48.5955	1.3141	17.1803	0.0430756	9.0653	0.147647	8.64241	11.4242	2.98535	0.216573	0.154664	62.9545	-	-	-	-	-	-	-	-	-	-	-	-	-	-	-	-	-	-	-	4.3916	31.3402	200.57	255.863	41.1287	137.895	69.2142	74.3052	13.4973	3.6337	213.342
OS9_E	8.41618	-104.645	2800	2016	Beryl	EMORB	USGS	48.7298	1.31731	17.199	0.0391433	9.0847	0.163759	8.60037	11.4812	3.00187	0.217457	0.15737	62.7907	-	-	-	-	-	-	-	-	-	-	-	-	-	-	-	-	-	-	-	-	-	-	-	-	-	-	-	-	-	-
OS9_F	8.41618	-104.645	2800	2016	Beryl	EMORB	USGS	48.17	1.30905	17.1501	0.0411346	9.07551	0.14954	8.601	11.4625	2.97558	0.221022	0.15656	62.8161	-	-	-	-	-	-	-	-	-	-	-	-	-	-	-	-	-	-	-	-	-	-	-	-	-	-	-	-	-	-
OS9_H	8.41618	-104.645	2800	2016	Beryl	EMORB	USGS	48.1526	1.30407	17.0426	0.044863	9.07465	0.144793	8.53081	11.4261	2.98181	0.219947	0.152282	62.6267	-	-	-	-	-	-	-	-	-	-	-	-	-	-	-	-	-	-	-	-	-	-	-	-	-	-	-	-	-	-
OS18_A	8.36108	-104.649	2976	2016	Beryl	NMORB	USGS	48.1392	1.27328	16.8433	0.0422523	8.68811	0.152295	9.06546	11.4818	3.03842	0.14698	0.136321	65.0344	-	-	-	-	-	-	-	-	-	-	-	-	-	-	-	-	-	-	-	4.75347	31.5298	197.515	252.13	44.5919	138.584	62.8855	68.8306	15.0991	1.47038	210.199
OS18_B	8.36108	-104.649	2976	2016	Beryl	NMORB	USGS	48.3483	1.26133	16.8957	0.0457374	8.67065	0.155846	9.04813	11.4849	3.0693	0.141597	0.154685	65.0367	-	-	-	-	-	-	-	-	-	-	-	-	-	-	-	-	-	-	-	-	-	-	-	-	-	-	-	-	-	-
OS18_C	8.36108	-104.649	2976	2016	Beryl	NMORB	USGS	48.63	1.24835	16.9994	0.0440654	8.66862	0.154016	9.02355	11.5112	3.05087	0.140183	0.151564	64.9801	-	-	-	-	-	-	-	-	-	-	-	-	-	-	-	-	-	-	-	-	-	-	-	-	-	-	-	-	-	-
OS18_D	8.36108	-104.649	2976	2016	Beryl	NMORB	USGS	48.4555	1.28297	17.0647	0.039833	8.74575	0.152559	8.73359	11.5648	3.12409	0.141562	0.158577	64.0295	-	-	-	-	-	-	-	-	-	-	-	-	-	-	-	-	-	-	-	4.99838	30.1745	212.802	251.33	46.7101	133.204	67.7787	78.0917	16.178	1.62346	212.363
OS18_E	8.36108	-104.649	2976	2016	Beryl	NMORB	USGS	48.4188	1.2743	16.8982	0.0464823	8.61917	0.157258	9.04212	11.5256	3.02178	0.138705	0.148425	65.1569	-	-	-	-	-	-	-	-	-	-	-	-	-	-	-	-	-	-	-	-	-	-	-	-	-	-	-	-	-	-
OS18_F	8.36108	-104.649	2976	2016	Beryl	NMORB	USGS	48.6868	1.27228	17.0849	0.0417339	8.66981	0.158911	8.91053	11.5664	3.04441	0.138192	0.159062	64.6896	-	-	-	-	-	-	-	-	-	-	-	-	-	-	-	-	-	-	-	-	-	-	-	-	-	-	-	-	-	-
OS18_G	8.36108	-104.649	2976	2016	Beryl	NMORB	USGS	48.5357	1.27149	17.1758	0.0440099	8.62308	0.149685	8.86054	11.5947	3.05984	0.135805	0.15535	64.6845	-	-	-	-	-	-	-	-	-	-	-	-	-	-	-	-	-	-	-	4.67339	30.7265	198.431	250.59	44.8418	136.362	62.5115	72.6903	15.3303	1.47135	212.564
OS18_H	8.36108	-104.649	2976	2016	Beryl	NMORB	USGS	48.5421	1.27684	17.0575	0.045293	8.64798	0.147687	9.08632	11.4869	3.04919	0.130421	0.148377	65.1918	-	-	-	-	-	-	-	-	-	-	-	-	-	-	-	-	-	-	-	-	-	-	-	-	-	-	-	-	-	-
OS18_I	8.36108	-104.649	2976	2016	Beryl	NMORB	USGS	48.1577	1.27453	17.0166	0.0408027	8.75488	0.153245	8.99435	11.4086	3.01791	0.150746	0.158253	64.6804	-	-	-	-	-	-	-	-	-	-	-	-	-	-	-	-	-	-	-	-	-	-	-	-	-	-	-	-	-	-
OS18_J	8.36108	-104.649	2976	2016	Beryl	NMORB	USGS	47.7562	1.24288	16.7367	0.0460388	8.57617	0.148141	8.86697	11.4277	3.10007	0.142941	0.140802	64.8256	-	-	-	-	-	-	-	-	-	-	-	-	-	-	-	-	-	-	-	-	-	-	-	-	-	-	-	-	-	-
4860_1	8.32989	-104.647	2987	2016	Beryl	EMORB	USGS	48.2595	2.49862	17.1214	0.036812	9.06175	0.143463	6.5411	8.89762	4.1388	1.19376	0.550049	56.2688	8.162	0.06	2.705e-06	3.06887e-11	6.61285	0.512977	5e-06	0.702949	8.9e-06	38.0186	0.00226	15.5435	0.00086	18.6117	0.0009	2.04275	4e-05	0.83514	1e-05	7.1381	19.7807	202.355	120.939	33.7098	76.1935	31.8636	94.3261	24.3988	23.6929	497.316
4860_2	8.33009	-104.648	2926	2016	Beryl	EMORB	USGS	48.8851	2.59754	17.4372	0.0301663	9.11675	0.157803	6.06583	9.02816	4.24705	1.25841	0.553036	54.2546	-	-	-	-	-	-	-	-	-	-	-	-	-	-	-	-	-	-	-	-	-	-	-	-	-	-	-	-	-	-
4860_3	8.3313	-104.65	2885	2016	Beryl	EMORB	USGS	48.1961	2.53801	17.2748	0.0291016	8.98057	0.144768	6.22007	8.94077	4.16886	1.22784	0.569164	55.2495	-	-	-	-	-	-	-	-	-	-	-	-	-	-	-	-	-	-	-	-	-	-	-	-	-	-	-	-	-	-
4860_4	8.33361	-104.654	2918	2016	Beryl	EMORB	USGS	48.327	2.51623	17.1241	0.0267134	9.16617	0.152985	6.67119	8.97211	4.11539	1.20734	0.556876	56.4714	-	-	-	-	-	-	-	-	-	-	-	-	-	-	-	-	-	-	-	7.22285	19.5183	201.293	120.217	33.7695	77.417	31.2887	94.8245	24.2647	23.2599	487.322
4860_5	8.33401	-104.656	2915	2016	Beryl	EMORB	USGS	48.919	2.61508	17.5031	0.0309997	8.64662	0.135	5.52227	8.83877	4.45434	1.48131	0.665093	53.2369	-	-	-	-	-	-	-	-	-	-	-	-	-	-	-	-	-	-	-	-	-	-	-	-	-	-	-	-	-	-
4860_6	8.33418	-104.657	2866	2016	Beryl	EMORB	USGS	48.8862	2.58799	17.49	0.022726	8.67	0.146546	5.48	8.82	4.44451	1.50597	0.669229	52.9783	-	-	-	-	6.39828	0.512966	6.4e-06	0.702945	1.1e-05	37.9813	0.0176	15.5364	0.0054	18.5793	0.00431	2.04442	0.000461	0.836253	9.42e-05	7.30205	21.5285	204.222	90.159	29.6653	47.2489	31.156	87.6691	26.7988	31.7574	533.546
4860_7	8.33406	-104.657	2827	2016	Beryl	EMORB	USGS	49.5973	3.07088	16.5914	0.0289713	9.38409	0.160266	4.60556	8.71709	4.60811	1.76437	0.790481	46.6621	-	-	-	-	-	-	-	-	-	-	-	-	-	-	-	-	-	-	-	7.68791	23.5757	226.709	162.458	26.2981	22.7414	34.7482	97.739	27.1425	35.2836	464.749
4860_8	8.33674	-104.66	2849	2016	Beryl	EMORB	USGS	49.4013	2.62005	17.4948	0.022431	8.67379	0.146729	5.50246	8.85098	4.47908	1.52359	0.672256	53.0693	-	-	-	-	-	-	-	-	-	-	-	-	-	-	-	-	-	-	-	-	-	-	-	-	-	-	-	-	-	-
4860_9	8.33736	-104.66	2784	2016	Beryl	EMORB	USGS	49.0153	2.58408	17.5114	0.026328	8.58904	0.138165	5.58812	8.79918	4.4474	1.49818	0.661246	53.698	-	-	-	-	-	-	-	-	-	-	-	-	-	-	-	-	-	-	-	-	-	-	-	-	-	-	-	-	-	-
4860_10	8.33896	-104.66	2760	2016	Beryl	EMORB	USGS	49.0386	2.54823	17.5275	0.023376	8.59362	0.13663	5.63785	8.79886	4.40517	1.47715	0.655236	53.905	-	-	-	-	-	-	-	-	-	-	-	-	-	-	-	-	-	-	-	6.6406	21.2469	194.493	128.241	27.6071	65.9591	33.169	74.4046	20.4433	25.9311	522.534
4860_11	8.34121	-104.66	2727	2016	Beryl	EMORB	USGS	49.2401	2.56571	17.4818	0.0270895	8.6182	0.141883	5.57285	8.8124	4.46676	1.48344	0.659234	53.5457	-	-	-	-	-	-	-	-	-	-	-	-	-	-	-	-	-	-	-	-	-	-	-	-	-	-	-	-	-	-
4860_12	8.34198	-104.661	2713	2016	Beryl	EMORB	USGS	49.2101	2.56686	17.5224	0.025785	8.68502	0.155867	5.6227	8.87518	4.47174	1.50285	0.663006	53.5751	-	-	-	-	6.26173	0.512959	4e-06	0.702917	1.5e-05	37.9764	0.00149	15.542	0.00048	18.577	0.00051	2.04427	4e-05	0.83663	1e-05	7.1517	19.2591	204.772	91.4043	30.3647	51.9128	31.4446	93.4841	26.4838	31.7782	518.484
4860_13	8.34243	-104.661	2721	2016	Beryl	EMORB	USGS	49.3469	2.58275	17.5617	0.029721	8.66481	0.147878	5.58904	8.89038	4.4666	1.52089	0.658705	53.4837	1.468	0.243	8.412e-09	1.71649e-14	-	-	-	0.702903	1.7e-05	37.9795	0.00137	15.5359	0.00053	18.5794	0.00057	2.04418	3e-05	0.83619	1e-05	7.46725	24.4025	225.33	116.424	32.4801	82.3501	37.5394	82.4046	23.8221	29.8651	608.634
4853_1	8.37812	-104.655	-	2016	Beryl	NMORB	UF	48.9696	1.231	16.8439	-	10.612	0.177	8.54591	10.8998	2.62704	0.0867	0.114	58.9404	6.513	0.052	1.692e-06	1.53178e-11	7.90031	0.513043	6e-06	0.702743	1.7e-05	38.2438	0.0111	15.5014	0.00416	18.7815	0.00455	2.03623	0.00014	0.82528	3e-05	4.8839	40.9548	198.285	234.114	50.3479	141.354	98.8371	82.1021	12.8044	0.6964	127.615
4853_2	8.37874	-104.654	2850	2016	Beryl	NMORB	UF	48.7857	1.166	17.0561	-	10.377	0.184	8.82813	10.8818	2.58752	0.08364	0.106	60.2619	-	-	-	-	-	-	-	-	-	-	-	-	-	-	-	-	-	-	-	4.4864	37.6722	201.102	241.988	52.6615	164.938	103.032	83.7839	13.4465	0.721115	123.737
4853_3	8.38015	-104.654	2867	2016	Beryl	NMORB	UF	48.9887	1.168	17.0794	-	10.387	0.188	8.67981	10.8139	2.6208	0.08976	0.093	59.8323	-	-	-	-	-	-	-	-	-	-	-	-	-	-	-	-	-	-	-	4.38596	38.0066	195.304	232.498	50.6882	153.998	99.3131	84.0983	12.8377	0.689199	126.131
4853_6	-	-	-	2016	Beryl	EMORB	-	-	-	-	-	-	-	-	-	-	-	-	-	-	-	-	-	-	-	-	-	-	-	-	-	-	-	-	-	-	-	-	7.50295	25.3323	241.937	98.8816	28.5127	59.4777	43.6663	82.5371	25.207	25.8498	556.884
4853_7	8.38627	-104.661	2724	2016	Beryl	EMORB	UF	49.1968	2.481	16.8967	-	9.489	0.165	6.2109	9.24826	3.78352	1.19952	0.546	53.8476	-	-	-	-	6.69088	0.512981	6.4e-06	0.702954	1.6e-05	37.9944	0.00387	15.5395	0.00151	18.5949	0.00178	2.04326	6.6e-05	0.835683	2.18e-05	6.89346	25.1239	222.304	118.678	34.9053	73.4759	40.0056	101.445	26.2875	21.5123	459.733
4853_8	8.38682	-104.662	2717	2016	Beryl	EMORB	UF	49.1495	2.451	16.8977	-	9.401	0.154	6.16249	9.25426	3.796	1.20258	0.543	53.8847	-	-	-	-	-	-	-	-	-	-	-	-	-	-	-	-	-	-	-	6.86003	25.1971	229.054	135.311	34.8602	89.5892	41.3815	85.7764	21.9004	20.9657	481.868
4853_9	8.38824	-104.665	2662	2016	Beryl	EMORB	UF	49.1386	2.52083	16.9387	-	9.46083	0.146667	6.10447	9.18636	3.77	1.22145	0.565833	53.4917	-	-	-	-	-	-	-	-	-	-	-	-	-	-	-	-	-	-	-	7.11959	24.9141	231.59	122.342	35.2974	71.549	40.7017	104.877	26.8858	22.6969	460.176
4853_10	8.38918	-104.666	2556	2016	Beryl	EMORB	UF	49.3064	2.49667	16.9325	-	9.54667	0.145556	6.36311	9.19412	3.83067	1.19793	0.566667	54.2984	-	-	-	-	6.55433	0.512974	5.4e-06	0.70282	1.2e-05	37.9725	0.00175	15.5371	0.00062	18.5578	0.00078	2.04612	3e-05	0.83725	1e-05	6.94882	24.3308	215.721	149.338	33.5355	106.225	39.5356	79.9612	21.2362	21.0125	479.632
4853_11	8.39055	-104.668	2454	2016	Beryl	EMORB	UF	49.827	2.59182	17.0741	-	8.68182	0.149091	5.29326	8.67802	4.14204	1.62087	0.727273	52.0798	1.898	0.128	2.617e-08	6.9e-14	6.22271	0.512957	5.6e-06	0.702977	1.5e-05	38.0124	0.00149	15.5394	0.00056	18.6044	0.00053	2.04313	3e-05	0.83524	1e-05	7.54973	24.4776	205.487	80.8995	26.2575	52.7802	39.8606	80.8229	22.8357	31.0722	529.063
4853_12	8.39083	-104.67	2390	2016	Beryl	EMORB	UF	49.0631	2.488	16.849	-	9.504	0.162	6.45501	9.04357	3.75128	1.19442	0.562	54.765	-	-	-	-	-	-	-	-	-	-	-	-	-	-	-	-	-	-	-	6.79573	25.3808	218.672	117.842	35.2066	82.5122	37.3238	97.6844	25.7658	21.558	466.008
4853_13	8.39168	-104.674	2317	2016	Beryl	EMORB	UF	49.3877	2.495	16.9738	-	9.477	0.151	6.22429	9.12145	3.67744	1.18728	0.557	53.9326	-	-	-	-	-	-	-	-	-	-	-	-	-	-	-	-	-	-	-	-	-	-	-	-	-	-	-	-	-	-
4853_14	8.39218	-104.677	2261	2016	Beryl	EMORB	UF	49.5968	2.634	17.2357	-	8.989	0.146	5.38381	8.69509	4.10072	1.57692	0.71	51.6352	-	-	-	-	6.84694	0.512989	4.4e-06	0.70296	1.3e-05	37.8751	0.0322	15.5034	0.00992	18.5574	0.00757	2.04128	0.000863	0.835557	0.000177	7.16938	23.4426	211.356	89.2488	29.2307	45.6144	34.2339	93.8502	29.3411	29.372	496.26
4853_15	8.39246	-104.679	-	2016	Beryl	EMORB	UF	49.7687	2.80111	16.99	-	9.17333	0.151111	5.11109	8.60611	4.12302	1.63653	0.738889	49.8287	-	-	-	-	-	-	-	-	-	-	-	-	-	-	-	-	-	-	-	7.62003	24.382	224.22	91.5976	29.1281	37.9546	35.8298	94.9133	29.92	30.843	480.739
OS19_A	8.35568	-104.76	3127	2016	Beryl	EMORB	USGS	47.9056	1.42072	17.291	0.039927	9.41918	0.164059	8.13975	11.0266	3.09685	0.234583	0.173187	60.6362	-	-	-	-	-	-	-	-	-	-	-	-	-	-	-	-	-	-	-	5.17964	29.6508	208.909	200.311	45.374	110.322	61.3667	83.6899	17.1946	4.02177	240.561
OS19_B	8.35568	-104.76	3127	2016	Beryl	EMORB	USGS	47.9135	1.40821	17.2811	0.0355702	9.51598	0.158058	8.07332	11.0585	3.16509	0.243247	0.165268	60.1957	-	-	-	-	-	-	-	-	-	-	-	-	-	-	-	-	-	-	-	-	-	-	-	-	-	-	-	-	-	-
OS19_C	8.35568	-104.76	3127	2016	Beryl	EMORB	USGS	47.1686	1.38419	17.3183	0.025713	9.28673	0.16997	8.2536	10.8632	3.12651	0.229263	0.179113	61.3038	-	-	-	-	-	-	-	-	-	-	-	-	-	-	-	-	-	-	-	-	-	-	-	-	-	-	-	-	-	-
OS19_D	8.35568	-104.76	3127	2016	Beryl	EMORB	USGS	47.5586	1.37562	17.3668	0.029893	9.37136	0.144029	8.21312	10.9954	3.15869	0.235073	0.172575	60.9714	-	-	-	-	-	-	-	-	-	-	-	-	-	-	-	-	-	-	-	-	-	-	-	-	-	-	-	-	-	-
OS19_E	8.35568	-104.76	3127	2016	Beryl	NMORB	USGS	47.5685	1.39364	17.3663	0.031894	9.29068	0.149021	8.26718	10.9701	3.14883	0.224623	0.16736	61.3327	-	-	-	-	-	-	-	-	-	-	-	-	-	-	-	-	-	-	-	-	-	-	-	-	-	-	-	-	-	-
OS19_F	8.35568	-104.76	3127	2016	Beryl	EMORB	USGS	47.9458	1.36759	17.4135	0.0384027	9.37675	0.163124	8.26893	11.0704	3.04926	0.238202	0.166408	61.1188	-	-	-	-	-	-	-	-	-	-	-	-	-	-	-	-	-	-	-	5.12286	29.7281	205.551	210.309	45.9267	118.33	60.4352	83.6973	17.2931	3.99787	243.069
OS19_G	8.35568	-104.76	3127	2016	Beryl	EMORB	USGS	47.5322	1.39358	17.1422	0.0324025	9.50607	0.182926	8.0594	10.9892	3.19347	0.239789	0.176473	60.1794	-	-	-	-	-	-	-	-	-	-	-	-	-	-	-	-	-	-	-	-	-	-	-	-	-	-	-	-	-	-
OS19_H	8.35568	-104.76	3127	2016	Beryl	EMORB	USGS	48.1781	1.36792	17.199	0.0352331	9.40351	0.167565	8.19925	11.2136	3.17248	0.228047	0.169006	60.8496	-	-	-	-	-	-	-	-	-	-	-	-	-	-	-	-	-	-	-	-	-	-	-	-	-	-	-	-	-	-
OS19_J	8.35568	-104.76	3127	2016	Beryl	NMORB	USGS	48.3051	1.0695	17.4409	0.0449991	8.43365	0.140063	9.20145	11.9981	2.78758	0.106188	0.116785	66.042	-	-	-	-	-	-	-	-	-	-	-	-	-	-	-	-	-	-	-	4.44578	28.9386	186.826	247.129	46.3903	151.792	73.1557	68.9289	15.1998	1.34191	166.591
4856_1	8.41148	-104.839	2736	2016	Rocky Ridge	EMORB	UF	48.8782	1.6175	16.0598	-	9.035	0.1625	8.7344	10.945	2.8639	0.47685	0.2275	63.2789	-	-	-	-	8.40749	0.513069	5.3e-06	0.702936	1.3e-05	38.1735	0.00331	15.5343	0.00118	18.6419	0.0014	2.04774	4.24e-05	0.833274	1.32e-05	5.16324	29.8839	218.622	309.343	37.6035	134.36	50.9197	80.5657	16.1739	8.14057	257.141
4856_2	8.40905	-104.838	2798	2016	Rocky Ridge	EMORB	UF	48.3174	1.7	16.5394	-	9.218	0.169	8.50471	10.6462	3.0888	0.51918	0.222	62.1871	-	-	-	-	-	-	-	-	-	-	-	-	-	-	-	-	-	-	-	-	-	-	-	-	-	-	-	-	-	-
4856_3	8.40746	-104.838	2807	2016	Rocky Ridge	EMORB	UF	48.3342	1.68125	16.528	-	9.26375	0.1725	8.55544	10.5755	3.1122	0.51255	0.21875	62.2105	-	-	-	-	-	-	-	-	-	-	-	-	-	-	-	-	-	-	-	5.41755	30.0602	216.28	259.481	37.6006	133.664	50.4497	79.692	16.866	10.5196	263.041
4856_4	8.40688	-104.838	2787	2016	Rocky Ridge	EMORB	UF	48.497	1.70286	16.5561	-	9.31143	0.172857	8.7241	10.493	3.1096	0.517286	0.221429	62.5482	-	-	-	-	-	-	-	-	-	-	-	-	-	-	-	-	-	-	-	5.45226	30.3844	217.262	260.338	37.616	134.853	50.1113	81.1933	17.0817	10.6128	266.871
4856_5	8.4064	-104.836	2783	2016	Rocky Ridge	EMORB	UF	48.5754	1.6725	16.5788	-	9.29	0.16875	8.68548	10.5706	3.081	0.511275	0.2175	62.4982	-	-	-	-	-	-	-	-	-	-	-	-	-	-	-	-	-	-	-	-	-	-	-	-	-	-	-	-	-	-
4856_6	8.40298	-104.829	2741	2016	Rocky Ridge	NMORB	UF	48.2882	1.272	16.9302	-	10.072	0.17	8.4872	11.2193	3.10128	0.15912	0.122	60.0329	-	-	-	-	-	-	-	-	-	-	-	-	-	-	-	-	-	-	-	4.88705	35.5186	189.711	241.15	42.755	115.182	78.0301	76.75	14.2132	2.0492	185.892
4856_7	8.40184	-104.828	2683	2016	Rocky Ridge	NMORB	UF	48.2185	1.31714	16.6562	-	10.5014	0.205714	8.06637	11.4002	3.09177	0.135514	0.125714	57.7917	-	-	-	-	-	-	-	-	-	-	-	-	-	-	-	-	-	-	-	-	-	-	-	-	-	-	-	-	-	-
4856_8	8.40071	-104.827	2608	2016	Rocky Ridge	NMORB	UF	48.1696	1.29625	16.8414	-	10.3825	0.17375	8.13056	11.1222	3.0745	0.164475	0.12875	58.2622	8.245	0.086	4.945e-06	5.66724e-11	-	-	-	0.702728	1.2e-05	38.1145	0.0016	15.5282	0.00068	18.6056	0.00082	2.04855	4e-05	0.83462	1e-05	5.61089	40.7019	234.478	273.733	51.7316	161.009	83.5787	80.0358	19.0669	3.12373	215.572
4856_9	8.39763	-104.825	2493	2016	Rocky Ridge	EMORB	UF	48.289	1.31875	17.0723	-	9.885	0.18625	8.43441	10.9899	3.1798	0.248625	0.165	60.3325	-	-	-	-	8.29045	0.513063	7.3e-06	0.70277	1.5e-05	38.125	0.00214	15.5317	0.00088	18.6148	0.00104	2.04814	4e-05	0.83439	1e-05	5.24	34.2	210	226	45.1	125	69.7	74	17.4	3.95	208
4856_10	8.39485	-104.823	2382	2016	Rocky Ridge	NMORB	UF	48.3116	1.18875	17.2157	-	10.005	0.15875	8.66101	11.1896	3.0186	0.1275	0.1225	60.6777	-	-	-	-	-	-	-	-	-	-	-	-	-	-	-	-	-	-	-	-	-	-	-	-	-	-	-	-	-	-
4856_12	8.39234	-104.823	2358	2016	Rocky Ridge	EMORB	UF	49.2807	2.06667	16.6302	-	8.72	0.15	7.24204	10.4534	3.49209	0.799	0.376667	59.6841	7.855	0.055	2.769e-06	3.02332e-11	7.68574	0.513032	8e-06	0.702922	1.7e-05	38.0363	0.00964	15.5125	0.00299	18.6213	0.0025	2.04253	0.00026	0.83303	5e-05	6.2987	31.4332	228.915	187.624	31.0627	87.6741	48.9131	78.701	18.908	16.7985	324.076
4852_1	8.42317	-104.94	2551	2016	Coral	EMORB	UF	49.4112	1.756	15.9436	-	9.081	0.164	8.37493	11.0616	2.91616	0.51612	0.254	62.1776	-	-	-	-	-	-	-	-	-	-	-	-	-	-	-	-	-	-	-	5.71055	33.4495	269.435	269.469	40.2247	109.419	59.963	84.0122	17.5981	10.5003	256.598
4852_2	8.42316	-104.94	2549	2016	Coral	EMORB	UF	49.5438	1.708	16.0735	-	8.982	0.159	8.21734	11.0606	2.93176	0.50286	0.26	61.9885	-	-	-	-	-	-	-	-	-	-	-	-	-	-	-	-	-	-	-	5.52502	37.2667	267.751	266.325	39.7309	106.717	59.2035	81.2941	17.299	10.9455	255.465
4852_3	8.42317	-104.94	2499	2016	Coral	EMORB	UF	49.4328	1.756	16.0827	-	9.091	0.17	8.11949	11.0985	2.96608	0.5202	0.259	61.4204	7.978	0.069	6.067e-06	6.72795e-11	8.38799	0.513068	7.6e-06	0.702888	1.2e-05	38.154	0.00304	15.5303	0.00127	18.617	0.00148	2.04946	3e-05	0.83419	1e-05	5.35543	35.1133	265.994	328.709	38.43	145.039	54.9015	89.0635	18.3875	7.7983	267.982
4852_4	8.42297	-104.94	2498	2016	Coral	EMORB	UF	49.4309	1.733	16.0583	-	9.101	0.17	8.21528	11.0376	2.96192	0.5151	0.249	61.672	-	-	-	-	-	-	-	-	-	-	-	-	-	-	-	-	-	-	-	5.23937	34.951	254.259	246.77	37.6594	96.9699	55.7097	77.6218	16.7138	10.1949	257.76
4852_5	8.42199	-104.942	2529	2016	Coral	EMORB	UF	49.3204	1.708	16.2004	-	9.008	0.17	8.34197	11.0236	2.92032	0.57528	0.25	62.2747	7.865	0.06	7.946e-06	8.68685e-11	7.93933	0.513045	8.3e-06	0.702967	1.1e-05	38.2063	0.00306	15.5324	0.00117	18.6513	0.00134	2.04841	4.72e-05	0.832775	1.31e-05	5.347	33.7874	258.938	245.684	38.0569	103.282	54.6797	77.7133	17.4329	12.5329	271.373
4852_6	8.42065	-104.943	2455	2016	Coral	EMORB	UF	49.2969	1.684	16.108	-	9.051	0.172	8.38214	11.0376	2.92864	0.57018	0.247	62.2756	-	-	-	-	-	-	-	-	-	-	-	-	-	-	-	-	-	-	-	5.46186	36.3986	269.391	259.209	40.1942	112.648	56.7972	78.9944	18.186	13.2351	270.618
4852_7	8.4244	-104.951	2512	2016	Coral	DMORB	UF	48.2631	1.295	16.8236	-	10.635	0.204	8.27399	11.3162	3.05344	0.10812	0.13	58.103	-	-	-	-	-	-	-	-	-	-	-	-	-	-	-	-	-	-	-	4.95403	38.1589	207.081	217.233	44.3916	88.9104	93.2417	75.4433	13.845	0.906082	175.09
4852_8	8.42543	-104.954	2277	2016	Coral	NMORB	UF	48.1956	1.235	17.2372	-	10.3408	0.183333	8.59106	11.1601	2.98393	0.0918	0.110833	59.6922	-	-	-	-	-	-	-	-	-	-	-	-	-	-	-	-	-	-	-	4.68266	36.9489	192.134	205.343	45.8036	107.975	85.6992	72.9086	14.1329	0.645569	179.903
4852_9	8.42562	-104.954	2240	2016	Coral	NMORB	UF	47.5186	1.219	17.3037	-	10.275	0.173	8.81165	11.0955	2.98168	0.09282	0.123	60.4535	-	-	-	-	-	-	-	-	-	-	-	-	-	-	-	-	-	-	-	4.65229	35.8362	189.999	204.036	46.229	116.235	84.7411	72.9382	13.4839	0.701981	180.169
4852_10	8.42551	-104.955	2186	2016	Coral	NMORB	UF	47.7717	1.225	17.2824	-	10.466	0.179	8.66333	11.2952	3.03056	0.09384	0.114	59.6043	-	-	-	-	-	-	-	-	-	-	-	-	-	-	-	-	-	-	-	4.95034	36.9826	189.708	202.252	45.4614	108.77	84.812	73.6747	13.7827	0.633518	179.927
4852_11	8.42542	-104.957	2108	2016	Coral	NMORB	UF	47.9513	1.24273	17.2762	-	10.3991	0.176364	8.83085	11.0926	2.94604	0.0973636	0.123636	60.2183	-	-	-	-	-	-	-	-	-	-	-	-	-	-	-	-	-	-	-	4.72998	37.0924	192.897	207.564	47.57	121.53	88.7255	73.3145	14.0893	0.70452	184.112
4852_12	8.42485	-104.959	2088	2016	Coral	NMORB	UF	48.1112	1.20545	17.2725	-	10.2264	0.174545	8.83085	11.0736	2.98575	0.0908727	0.125455	60.6188	-	-	-	-	8.97319	0.513098	6.7e-06	0.702505	1.8e-05	37.9954	0.00212	15.5163	0.00096	18.6052	0.00105	2.04212	4e-05	0.83397	1e-05	4.78542	37.5418	191.982	215.575	45.0702	142.456	80.846	72.041	16.8726	0.72909	191.974
4852_13	8.42415	-104.96	2104	2016	Coral	NMORB	UF	48.0963	1.218	17.2388	-	10.327	0.176	8.79517	11.0566	3.00144	0.09384	0.123	60.2879	-	-	-	-	-	-	-	-	-	-	-	-	-	-	-	-	-	-	-	4.664	36.1639	188.325	200.701	45.9024	116.66	85.3119	72.9778	13.564	0.699453	183.078
4852_14	8.42347	-104.961	2113	2016	Coral	DMORB	UF	47.9023	1.257	17.3281	-	10.504	0.182	8.64273	11.1444	2.94112	0.09588	0.122	59.4596	-	-	-	-	-	-	-	-	-	-	-	-	-	-	-	-	-	-	-	4.82256	38.6607	194.793	205.692	46.6624	111.779	87.2854	74.0922	13.7495	0.710501	187.182
4852_15	8.42315	-104.962	2068	2016	Coral	NMORB	UF	48.0661	1.265	17.1647	-	10.521	0.182	8.56136	11.0955	3.01496	0.102	0.128	59.1923	-	-	-	-	-	-	-	-	-	-	-	-	-	-	-	-	-	-	-	4.81355	41.0557	193.252	201.508	46.1923	107.247	88.0403	75.0246	13.7484	0.667514	185.695
4852_16	8.42242	-104.963	2039	2016	Coral	NMORB	UF	48.039	1.19538	17.2909	-	10.3938	0.175385	8.76134	11.0828	2.9608	0.0933692	0.120769	60.0409	-	-	-	-	-	-	-	-	-	-	-	-	-	-	-	-	-	-	-	4.57581	37.7538	183.904	193.967	45.3377	114.409	83.334	69.1659	13.5808	0.646199	179.837
5003_3	8.3985	-104.971	2878	2018	Coral	NMORB	UF	50.2177	2.12763	13.9264	-	11.8244	0.235475	6.18871	10.534	3.34976	0.301131	0.242754	48.2656	-	-	-	-	9.10974	0.513105	5e-06	0.702514	2.3e-05	38.0219	0.00233	15.5146	0.00092	18.5319	0.00107	2.05172	4e-05	0.83718	1e-05	7.67	43.1	324	62.2	38.1	35.5	60.4	93.6	19.3	2.98	167
5003_7	8.41	-104.971	2872	2018	Coral	NMORB	UF	50.0468	2.05678	14.0037	-	11.6253	0.240109	6.32227	10.7101	3.36328	0.283673	0.240217	49.2233	-	-	-	-	-	-	-	-	-	-	-	-	-	-	-	-	-	-	-	-	-	-	-	-	-	-	-	-	-	-
5003_10	8.40317	-104.972	2821	2018	Coral	EMORB	UF	49.7211	1.86478	14.7063	-	10.1799	0.182618	6.99456	11.6753	3.1849	0.330073	0.227174	55.0515	-	-	-	-	-	-	-	-	-	-	-	-	-	-	-	-	-	-	-	-	-	-	-	-	-	-	-	-	-	-
5003_11	8.4035	-104.972	2809	2018	Coral	EMORB	UF	50.088	1.83659	14.6319	-	10.1807	0.186685	6.87629	11.4888	3.17809	0.350675	0.23406	54.6272	-	-	-	-	-	-	-	-	-	-	-	-	-	-	-	-	-	-	-	-	-	-	-	-	-	-	-	-	-	-
5003_12	8.404	-104.972	2810	2018	Coral	EMORB	UF	49.7704	1.8053	14.7632	-	10.0856	0.214182	7.01954	11.6832	3.14813	0.332182	0.226449	55.3699	-	-	-	-	8.93418	0.513096	5.1e-06	0.702733	1.7e-05	38.1007	0.00194	15.5263	0.00071	18.5864	0.00084	2.04983	3e-05	0.83533	1e-05	6.46	43.6	292	205	37.5	57.9	80.4	89.4	18.3	4.9	179
5003_14	8.40633	-104.974	2794	2018	Coral	NMORB	UF	48.0809	1.18615	17.2056	-	10.1686	0.158881	8.56962	10.9178	2.91713	0.105944	0.111612	60.0358	-	-	-	-	-	-	-	-	-	-	-	-	-	-	-	-	-	-	-	-	-	-	-	-	-	-	-	-	-	-
5003_15	8.40667	-104.974	2775	2018	Coral	NMORB	UF	47.6533	1.21153	17.3877	-	10.3854	0.200655	8.44634	11.094	2.93848	0.106509	0.121739	59.179	-	-	-	-	-	-	-	-	-	-	-	-	-	-	-	-	-	-	-	-	-	-	-	-	-	-	-	-	-	-
5003_19	8.40717	-104.975	2761	2018	Coral	NMORB	UF	47.9366	1.20049	17.2036	-	10.2608	0.195622	8.57697	10.9028	2.89539	0.105944	0.139786	59.8397	-	-	-	-	9.05122	0.513102	7.3e-06	0.70255	8.7e-06	37.8982	0.00316	15.5091	0.00121	18.4872	0.00142	2.04999	3e-05	0.83891	1e-05	4.71	36.5	199	252	48	146	78.4	69.4	16.3	0.65	175
5003_20	8.40917	-104.973	2711	2018	Coral	DMORB	UF	47.6268	1.30049	17.0288	-	10.5541	0.187409	8.24627	11.1671	2.97844	0.110727	0.130435	58.2072	-	-	-	-	-	-	-	-	-	-	-	-	-	-	-	-	-	-	-	5.39	41.3	224	288	55.6	176	88.4	77.7	18.4	0.66	198
5003_21A	8.40933	-104.973	2717	2018	Coral	NMORB	UF	48.0799	1.20049	17.2538	-	10.2517	0.159874	8.69778	10.9168	2.89435	0.105944	0.123532	60.1966	-	-	-	-	-	-	-	-	-	-	-	-	-	-	-	-	-	-	-	4.88	37.7	191	250	46	158	81.1	72	16.6	0.87	184
5003_21B	8.40933	-104.973	2717	2018	Coral	NMORB	UF	48.0869	1.20357	17.1503	-	10.355	0.163846	8.50344	10.9656	2.9482	0.107003	0.12895	59.4123	-	-	-	-	-	-	-	-	-	-	-	-	-	-	-	-	-	-	-	-	-	-	-	-	-	-	-	-	-	-
5003_22	8.41033	-104.974	2662	2018	Coral	NMORB	UF	48.1808	1.19247	17.2594	-	10.2191	0.175431	8.55334	10.9683	2.92628	0.104178	0.123712	59.8712	-	-	-	-	8.7196	0.513085	7.1e-06	0.702528	1.2e-05	37.8768	0.00391	15.5044	0.00155	18.4729	0.00181	2.05031	6.98e-05	0.839297	1.42e-05	4.52785	36.5226	203.357	263.289	53.4292	176.269	79.4619	70.3474	15.6958	0.92935	179.594
5003_23	8.41333	-104.976	2655	2018	Coral	DMORB	UF	50.782	1.12909	16.3913	-	10.1656	0.171345	8.42137	9.7257	2.73021	0.0611636	0.0891304	59.6233	6.486	0.037	2.189e-05	1.9735e-10	3.6478	0.512825	6.9e-06	0.702976	2.3e-05	40.2476	0.00741	15.7151	0.00282	20.1775	0.00367	1.99471	4e-05	0.77884	2e-05	5.81	26.5	152	458	45.6	231	84.3	90.4	18.8	0.48	107
5003_23_X	8.41333	-104.976	2655	2018	Coral	DMORB	UF	50.782	1.12909	16.3913	-	10.1656	0.171345	8.42137	9.7257	2.73021	0.0611636	0.0891304	59.6233	-	-	-	-	4.2135	0.512854	3.9e-06	0.702933	1e-05	40.2909	0.0275	15.7155	0.0081	20.1565	0.00707	1.99889	0.000673	0.779913	0.00021	5.81	26.5	152	458	45.6	231	84.3	90.4	18.8	0.48	107
5003_24	8.41433	-104.977	2622	2018	Coral	DMORB	UF	50.7693	1.10961	16.1598	-	10.0663	0.169091	8.46785	9.72042	2.64979	0.0597576	0.0929952	59.9918	6.531	0.044	1.632e-05	1.48154e-10	4.40857	0.512864	6.1e-06	0.702926	1.2e-05	40.1404	0.00399	15.6851	0.0019	20.1082	0.00217	1.9963	4.98e-05	0.779995	1.74e-05	5.30988	24.511	167.813	469.372	51.47	223.871	80.8317	92.4319	17.5162	0.5855	106.836
5003_25	8.415	-104.977	2592	2018	Coral	DMORB	UF	51.9572	1.09136	16.1852	-	10.0538	0.154367	8.57077	9.57737	2.71878	0.0635664	0.0916145	60.311	6.52	0.045	1.489e-05	1.34945e-10	4.44758	0.512866	6.7e-06	0.702912	1.2e-05	40.2154	0.00686	15.7045	0.00273	20.1359	0.00339	1.99722	4e-05	0.77994	1e-05	5.64	25.1	159	448	49.2	227	76.9	86.1	17.5	0.26	98.7
5003_25_X	8.415	-104.977	2592	2018	Coral	DMORB	UF	51.9572	1.09136	16.1852	-	10.0538	0.154367	8.57077	9.57737	2.71878	0.0635664	0.0916145	60.311	-	-	-	-	4.27202	0.512857	5.4e-06	0.702914	9.2e-06	40.2048	0.011	15.702	0.00332	20.1123	0.00302	1.99901	0.000274	0.780715	5.66e-05	5.64	25.1	159	448	49.2	227	76.9	86.1	17.5	0.26	98.7
5004_3	8.42167	-104.976	2610	2018	Coral	NMORB	UF	48.8741	1.2722	16.9844	-	9.50189	0.168811	8.62635	11.1011	3.01551	0.173748	0.153873	61.8071	7.888	0.048	1.48e-05	1.62272e-10	8.54404	0.513076	5.3e-06	0.702504	1.3e-05	37.9775	0.00285	15.5129	0.00115	18.5107	0.00143	2.05158	3e-05	0.83805	1e-05	4.7	34.2	194	234	41.9	156	75.2	67.4	16.3	1.21	200
5004_5	8.42383	-104.976	2570	2018	Coral	NMORB	UF	48.755	1.27015	17.3222	-	9.39651	0.170797	8.64525	11.15	2.96373	0.165273	0.150622	62.1215	-	-	-	-	-	-	-	-	-	-	-	-	-	-	-	-	-	-	-	4.68	33.4	211	273	44.7	170	76.5	70.7	16.5	1.09	204
5004_7	8.42383	-104.976	2572	2018	Coral	NMORB	UF	48.8357	1.28859	17.3011	-	9.53836	0.153916	8.45617	11.1161	2.9192	0.168451	0.141953	61.2447	-	-	-	-	-	-	-	-	-	-	-	-	-	-	-	-	-	-	-	-	-	-	-	-	-	-	-	-	-	-
5004_8	8.42467	-104.978	2567	2018	Coral	NMORB	UF	48.4835	1.29166	17.3011	-	9.4107	0.174769	8.5234	11.1739	2.92231	0.162094	0.151706	61.7513	-	-	-	-	-	-	-	-	-	-	-	-	-	-	-	-	-	-	-	4.74	35.9	208	263	46.9	159	74.5	66.8	16.4	1.45	207
5004_9	8.4245	-104.979	2542	2018	Coral	NMORB	UF	48.757	1.2722	17.2026	-	9.42286	0.146965	8.40575	11.0623	2.91299	0.17057	0.154957	61.3919	-	-	-	-	-	-	-	-	-	-	-	-	-	-	-	-	-	-	-	-	-	-	-	-	-	-	-	-	-	-
5004_10	8.42467	-104.98	2535	2018	Coral	NMORB	UF	48.9205	1.25888	17.2488	-	9.57889	0.170797	8.61269	11.136	2.98134	0.167392	0.158207	61.5789	-	-	-	-	8.83664	0.513091	4.8e-06	0.702464	2e-05	37.9657	0.0031	15.5092	0.00131	18.5033	0.0016	2.05184	3e-05	0.83818	1e-05	4.38	31.6	199	238	41.9	153	74.3	65.5	16.1	0.92	195
5004_15	8.424	-104.986	2560	2018	Coral	NMORB	UF	50.753	1.59895	15.3809	-	9.0044	0.159874	7.73136	11.6811	2.99066	0.253206	0.208054	60.4824	-	-	-	-	-	-	-	-	-	-	-	-	-	-	-	-	-	-	-	-	-	-	-	-	-	-	-	-	-	-
OS17_A	8.42976	-105.022	3021	2016	Coral	EMORB	UF	50.3548	1.19429	16.862	-	8.32429	0.154286	8.7035	11.7411	2.65051	0.211286	0.128571	65.0806	-	-	-	-	-	-	-	-	-	-	-	-	-	-	-	-	-	-	-	-	-	-	-	-	-	-	-	-	-	-
OS17_B	8.42976	-105.022	3021	2016	Coral	EMORB	UF	50.6156	1.1775	16.8389	-	8.28625	0.15	8.68548	11.6614	2.6052	0.202725	0.13125	65.1376	-	-	-	-	-	-	-	-	-	-	-	-	-	-	-	-	-	-	-	-	-	-	-	-	-	-	-	-	-	-
OS17_C	8.42976	-105.022	3021	2016	Coral	EMORB	UF	50.575	1.205	16.7424	-	8.28667	0.146667	8.58162	11.7326	2.678	0.2108	0.135	64.8627	-	-	-	-	-	-	-	-	-	-	-	-	-	-	-	-	-	-	-	4.84236	33.2775	208.335	360.806	41.8162	135.166	77.7737	71.4868	13.6244	2.48701	159.884
OS17_E	8.42976	-105.022	3021	2016	Coral	EMORB	UF	50.3867	1.164	16.8693	-	8.236	0.146	8.71174	11.7206	2.62912	0.20808	0.142	65.344	-	-	-	-	-	-	-	-	-	-	-	-	-	-	-	-	-	-	-	4.52387	34.1162	196.398	335.867	38.9973	130.491	71.4024	65.4437	12.6991	2.24739	157.622
OS17_F	8.42976	-105.022	3021	2016	Coral	EMORB	UF	50.4249	1.158	16.7617	-	8.22	0.136	8.82298	11.5848	2.59584	0.204	0.126	65.6746	-	-	-	-	-	-	-	-	-	-	-	-	-	-	-	-	-	-	-	4.57619	32.2734	199.782	355.92	41.7065	155.937	76.5267	68.8023	13.2234	2.33524	154.647
OS7_A	8.3807	-105.025	3134	2016	Coral	EMORB	UF	49.4803	1.88833	15.8162	-	9.69833	0.174167	7.23232	11.2608	2.8392	0.5049	0.270833	57.0684	-	-	-	-	-	-	-	-	-	-	-	-	-	-	-	-	-	-	-	-	-	-	-	-	-	-	-	-	-	-
OS7_B	8.3807	-105.025	3134	2016	Coral	EMORB	UF	48.9736	1.744	16.0055	-	9.437	0.17	7.90628	11.0775	2.80384	0.47736	0.265	59.8941	-	-	-	-	-	-	-	-	-	-	-	-	-	-	-	-	-	-	-	5.55441	33.8921	248.312	263.41	33.7983	97.5287	50.4881	81.9592	15.4966	10.2271	231.641
OS7_C	8.3807	-105.025	3134	2016	Coral	EMORB	UF	48.7873	1.76545	16.0204	-	9.41636	0.177273	7.82332	11.0572	2.72953	0.470127	0.259091	59.6932	-	-	-	-	-	-	-	-	-	-	-	-	-	-	-	-	-	-	-	-	-	-	-	-	-	-	-	-	-	-
OS7_D	8.3807	-105.025	3134	2016	Coral	EMORB	UF	48.848	1.765	16.0411	-	9.413	0.17	7.84036	11.0726	2.76328	0.4743	0.261	59.7541	-	-	-	-	-	-	-	-	-	-	-	-	-	-	-	-	-	-	-	-	-	-	-	-	-	-	-	-	-	-
OS7_E	8.3807	-105.025	3134	2016	Coral	EMORB	UF	48.9304	1.77	16.0411	-	9.399	0.163	7.80328	11.1275	2.77888	0.47634	0.257	59.6759	-	-	-	-	-	-	-	-	-	-	-	-	-	-	-	-	-	-	-	-	-	-	-	-	-	-	-	-	-	-
OS7_F	8.3807	-105.025	3134	2016	Coral	EMORB	UF	49.0239	1.766	15.9406	-	9.526	0.16	8.01855	11.0436	2.76432	0.47532	0.26	60.0073	-	-	-	-	-	-	-	-	-	-	-	-	-	-	-	-	-	-	-	-	-	-	-	-	-	-	-	-	-	-
OS7_G	8.3807	-105.025	3134	2016	Coral	EMORB	UF	48.7405	1.732	15.9781	-	9.462	0.164	7.9619	11.0456	2.756	0.46818	0.247	59.9989	-	-	-	-	-	-	-	-	-	-	-	-	-	-	-	-	-	-	-	5.51361	31.7357	254.806	272.361	35.081	107.002	51.7341	88.1569	16.0457	10.5817	227.712
4859_1	8.41788	-105.041	2882	2016	Coral	EMORB	UF	47.8799	1.52167	16.1859	-	10.71	0.188333	8.2812	11.027	3.02467	0.3009	0.173333	57.9531	-	-	-	-	-	-	-	-	-	-	-	-	-	-	-	-	-	-	-	6.3261	35.0786	252.667	236.622	49.0343	125.394	54.8841	107.416	13.4864	6.56488	215.373
4859_2	8.41969	-105.039	2993	2016	Coral	EMORB	UF	47.7898	1.242	17.253	-	9.856	0.17	8.8992	11.6747	2.7664	0.23868	0.176	61.6783	-	-	-	-	-	-	-	-	-	-	-	-	-	-	-	-	-	-	-	4.72534	43.0202	215.551	199.218	49.4172	129.025	64.9129	71.5091	11.1355	3.68696	227.296
4859_3	8.42105	-105.038	2920	2016	Coral	EMORB	UF	49.452	1.524	16.0532	-	8.75	0.158	8.14936	12.152	2.87456	0.37536	0.226	62.4085	-	-	-	-	-	-	-	-	-	-	-	-	-	-	-	-	-	-	-	5.13221	39.1374	252.352	277.998	42.5198	88.8228	60.4941	76.6464	12.122	5.93477	258.22
4859_4	8.42215	-105.036	2869	2016	Coral	EMORB	UF	49.3584	1.51143	16.1545	-	8.76429	0.165714	8.17084	12.2247	2.82286	0.3774	0.218571	62.432	-	-	-	-	-	-	-	-	-	-	-	-	-	-	-	-	-	-	-	5.18713	37.5253	257.277	283.212	43.5528	90.0468	62.1703	80.378	12.4664	6.14409	255.625
4859_5	8.42144	-105.033	2931	2016	Coral	EMORB	UF	47.2036	1.14375	17.2271	-	10.0975	0.1725	9.29317	11.5603	2.6546	0.225675	0.16875	62.129	-	-	-	-	-	-	-	-	-	-	-	-	-	-	-	-	-	-	-	4.65574	39.3941	209.472	237.381	51.5928	152.082	64.1711	72.9925	10.5586	3.48578	209.181
4859_6	8.42119	-105.032	2960	2016	Coral	EMORB	UF	47.3412	1.19714	17.2898	-	10.0143	0.177143	9.2597	11.5471	2.68023	0.2244	0.171429	62.2388	-	-	-	-	8.03686	0.51305	1.1e-05	0.702693	1.1e-05	38.0498	0.00382	15.5302	0.00153	18.5402	0.00193	2.05225	6e-05	0.83764	2e-05	4.9686	41.9205	224.439	247.93	54.6249	159.512	69.0964	78.0758	11.4087	3.7245	218.999
4859_7	8.42083	-105.032	2931	2016	Coral	EMORB	UF	47.2893	1.148	17.4885	-	9.684	0.17	8.93628	11.6207	2.7144	0.22032	0.164	62.1914	-	-	-	-	-	-	-	-	-	-	-	-	-	-	-	-	-	-	-	-	-	-	-	-	-	-	-	-	-	-
4859_8	8.42073	-105.029	2926	2016	Coral	NMORB	UF	47.6511	1.11	17.6427	-	8.75	0.162	10.5534	11.445	2.7872	0.11628	0.118	68.2531	-	-	-	-	8.21242	0.513059	7.6e-06	0.702638	1.1e-05	38.002	0.00476	15.5142	0.00197	18.4313	0.00224	2.06169	4.94e-05	0.84173	1.97e-05	4.68794	31.0008	179.026	288.994	53.6557	203.47	67.6908	72.9755	10.1484	1.64913	198.854
4859_9	8.42046	-105.028	2832	2016	Coral	EMORB	UF	50.0812	1.622	15.6858	-	8.788	0.17	7.8589	12.2897	2.86	0.41616	0.236	61.4507	-	-	-	-	-	-	-	-	-	-	-	-	-	-	-	-	-	-	-	-	-	-	-	-	-	-	-	-	-	-
4859_10	8.42022	-105.026	2774	2016	Coral	EMORB	UF	50.178	1.66833	15.6209	-	8.89	0.155	7.80053	12.2385	2.87733	0.4182	0.255	60.9997	-	-	-	-	8.48552	0.513073	9e-06	0.702782	1.2e-05	38.0981	0.0178	15.5175	0.00541	18.6216	0.00435	2.04585	0.00057	0.83329	0.00012	5.6147	36.2794	263.272	259.448	41.2752	75.3543	57.5849	81.5717	13.6778	10.6214	251.657
4859_11	8.42017	-105.025	2770	2016	Coral	EMORB	UF	50.1438	1.64571	15.5121	-	8.92571	0.172857	7.77797	12.2005	2.86891	0.422571	0.247143	60.8353	-	-	-	-	-	-	-	-	-	-	-	-	-	-	-	-	-	-	-	-	-	-	-	-	-	-	-	-	-	-
4859_12	8.42079	-105.021	2703	2016	Coral	EMORB	UF	50.3706	1.575	15.4293	-	8.68125	0.1675	7.91426	12.0446	2.7872	0.399075	0.245	61.9055	-	-	-	-	-	-	-	-	-	-	-	-	-	-	-	-	-	-	-	5.07439	40.8125	263.497	268.413	40.1389	68.3005	63.5508	75.1185	12.1694	7.11401	231.518
4859_13	8.42127	-105.02	2801	2016	Coral	EMORB	UF	50.4058	1.51167	16.0235	-	8.52333	0.161667	8.1164	12.0155	2.7976	0.3961	0.24	62.9277	-	-	-	-	-	-	-	-	-	-	-	-	-	-	-	-	-	-	-	4.98664	39.2011	255.694	263.877	40.2784	77.2228	60.7903	74.3964	11.8986	6.79355	235.833
4859_14	8.4211	-105.018	2753	2016	Coral	EMORB	UF	49.9224	1.694	17.3321	-	8.75	0.166	7.13996	11.7985	3.03472	0.46104	0.268	59.2592	-	-	-	-	-	-	-	-	-	-	-	-	-	-	-	-	-	-	-	-	-	-	-	-	-	-	-	-	-	-
4859_15	8.42115	-105.017	2700	2016	Coral	EMORB	UF	49.3824	1.7	16.739	-	8.99833	0.158333	8.08207	11.3565	2.88773	0.4658	0.248333	61.5536	-	-	-	-	-	-	-	-	-	-	-	-	-	-	-	-	-	-	-	-	-	-	-	-	-	-	-	-	-	-
4859_16	8.42146	-105.015	2654	2016	Coral	EMORB	UF	49.5043	1.664	16.8429	-	9.034	0.156	8.08962	11.431	2.97648	0.4794	0.262	61.4821	-	-	-	-	-	-	-	-	-	-	-	-	-	-	-	-	-	-	-	5.57903	34.0131	253.704	259.469	43.0826	96.6903	54.5133	85.0207	14.1716	10.8959	278.32
OS16_A	8.45955	-105.047	3070	2016	Coral	EMORB	UF	49.0797	2.07889	16.3246	-	9.45778	0.157778	7.60598	10.5222	3.22747	0.529267	0.313333	58.9073	-	-	-	-	-	-	-	-	-	-	-	-	-	-	-	-	-	-	-	-	-	-	-	-	-	-	-	-	-	-
OS16_B	8.45955	-105.047	3070	2016	Coral	EMORB	UF	49.1636	2.051	16.309	-	9.612	0.176	7.56123	10.5583	3.3228	0.52632	0.315	58.3719	-	-	-	-	-	-	-	-	-	-	-	-	-	-	-	-	-	-	-	6.97375	31.8772	230.706	220.25	33.4497	95.0938	48.1105	92.8756	18.0593	9.2183	248.365
OS16_C	8.45955	-105.047	3070	2016	Coral	EMORB	UF	49.2919	2.07	16.3404	-	9.57222	0.163333	7.622	10.4622	3.32569	0.525867	0.334444	58.6668	-	-	-	-	-	-	-	-	-	-	-	-	-	-	-	-	-	-	-	-	-	-	-	-	-	-	-	-	-	-
OS16_D	8.45955	-105.047	3070	2016	Coral	EMORB	UF	49.5632	2.09444	16.4204	-	9.43111	0.162222	7.37251	10.4489	3.33493	0.534933	0.324444	58.2193	-	-	-	-	-	-	-	-	-	-	-	-	-	-	-	-	-	-	-	-	-	-	-	-	-	-	-	-	-	-
OS16_E	8.45955	-105.047	3070	2016	Coral	EMORB	UF	50.2366	2.02667	16.8262	-	9.31625	0.171111	7.73144	9.929	2.59851	0.497533	0.324444	59.6661	-	-	-	-	-	-	-	-	-	-	-	-	-	-	-	-	-	-	-	-	-	-	-	-	-	-	-	-	-	-
OS16_F	8.45955	-105.047	3070	2016	Coral	EMORB	UF	49.588	2.075	16.3605	-	9.525	0.19	7.64904	10.4545	3.3176	0.521475	0.32625	58.8725	-	-	-	-	-	-	-	-	-	-	-	-	-	-	-	-	-	-	-	7.24332	32.5194	239.937	229.836	34.7705	98.4066	50.6805	94.4209	18.7111	9.62796	250.492
OS14_A	8.47033	-105.11	3127	2016	Otto Ridge	EMORB	UF	49.5409	2.05333	16.328	-	9.28556	0.178889	7.34504	9.74885	3.36613	0.8092	0.441111	58.5065	-	-	-	-	7.64672	0.51303	3e-06	0.70291	9.5e-06	38.1588	0.00255	15.5371	0.000984	18.6947	0.00101	2.04113	4.08e-05	0.831075	1.4e-05	7.29786	32.2466	260.276	212.499	35.0301	93.1003	52.3978	87.6802	22.7729	16.3259	336.799
OS14_B	8.47033	-105.11	3127	2016	Otto Ridge	EMORB	UF	49.4761	2.04182	16.3129	-	9.24182	0.181818	7.41881	9.79273	3.39891	0.814145	0.443636	58.8633	-	-	-	-	-	-	-	-	-	-	-	-	-	-	-	-	-	-	-	7.23107	32.7914	261.32	215.543	35.6867	99.1433	52.9889	86.5816	22.5891	16.3784	336.41
OS14_C	8.47033	-105.11	3127	2016	Otto Ridge	EMORB	UF	49.5415	2.05	16.2897	-	9.205	0.159	7.33463	9.84238	3.36232	0.81294	0.444	58.6835	-	-	-	-	-	-	-	-	-	-	-	-	-	-	-	-	-	-	-	-	-	-	-	-	-	-	-	-	-	-
OS14_D	8.47033	-105.11	3127	2016	Otto Ridge	EMORB	UF	49.4297	2.0625	16.2527	-	9.2375	0.18125	7.2924	9.78047	3.3943	0.809625	0.44625	58.4579	-	-	-	-	-	-	-	-	-	-	-	-	-	-	-	-	-	-	-	7.59743	31.2574	271.888	222.529	36.5999	99.5228	54.525	88.4393	22.7262	17.0068	332.998
OS14_E	8.47033	-105.11	3127	2016	Otto Ridge	EMORB	UF	49.5767	2.041	16.3202	-	9.319	0.169	7.29858	9.70359	3.37376	0.8058	0.455	58.265	-	-	-	-	-	-	-	-	-	-	-	-	-	-	-	-	-	-	-	-	-	-	-	-	-	-	-	-	-	-
OS14_F	8.47033	-105.11	3127	2016	Otto Ridge	EMORB	UF	49.4641	2.074	16.2745	-	9.355	0.175	7.34596	9.72256	3.41952	0.80988	0.45	58.3286	-	-	-	-	-	-	-	-	-	-	-	-	-	-	-	-	-	-	-	-	-	-	-	-	-	-	-	-	-	-
4857_1	8.4519	-105.13	2456	2016	Otto Ridge	EMORB	UF	49.0113	1.7575	15.9863	-	9.23	0.1725	8.37647	11.2857	2.7976	0.5661	0.2775	61.7985	-	-	-	-	-	-	-	-	-	-	-	-	-	-	-	-	-	-	-	5.68897	35.402	274.119	320.681	42.0133	125.886	52.3962	87.2987	19.4956	13.765	294.809
4857_2	8.45191	-105.13	2440	2016	Otto Ridge	EMORB	UF	49.1495	1.69833	16.1182	-	9.13	0.175	8.2915	11.25	2.84093	0.5729	0.266667	61.815	-	-	-	-	-	-	-	-	-	-	-	-	-	-	-	-	-	-	-	5.34278	37.2076	257.057	258.671	39.0941	116.422	50.8671	79.1798	18.5021	13.0554	291.971
4857_3	8.45179	-105.127	2420	2016	Otto Ridge	EMORB	UF	49.7358	1.67833	16.3364	-	9.12667	0.163333	8.17305	11.4497	2.94493	0.5644	0.27	61.4834	7.973	0.062	1.22e-05	1.35206e-10	8.11489	0.513054	1.1e-05	0.70303	1.4e-05	38.1921	0.00281	15.54	0.00111	18.6363	0.00132	2.04933	3e-05	0.83386	1e-05	5.22331	36.1308	260.655	340.182	37.9551	135.95	52.3648	74.9268	17.9321	11.1661	297.195
4857_4	8.45013	-105.123	2480	2016	Otto Ridge	EMORB	UF	49.8028	1.89	16.5141	-	9.04	0.1775	7.92842	10.5493	3.25	0.53295	0.29	60.9886	-	-	-	-	-	-	-	-	-	-	-	-	-	-	-	-	-	-	-	5.90558	32.037	250.357	220.556	37.4124	111.586	45.81	81.9543	18.6244	11.388	261.835
4857_5	8.45014	-105.123	2480	2016	Otto Ridge	EMORB	UF	49.7998	1.904	16.4572	-	9.136	0.172	7.92482	10.5883	3.30096	0.52224	0.294	60.7261	-	-	-	-	-	-	-	-	-	-	-	-	-	-	-	-	-	-	-	5.97958	32.9244	255.226	226.786	38.7468	119.433	50.5288	84.4187	18.8571	11.5522	266.718
4857_7	8.45073	-105.12	2476	2016	Otto Ridge	DMORB	UF	48.3526	1.352	17.4966	-	10.126	0.186	8.71174	11.0656	3.13664	0.06732	0.13	60.5301	-	-	-	-	8.32946	0.513065	3.9e-06	0.702621	1.1e-05	38.0534	0.00911	15.5249	0.00283	18.5398	0.00239	2.05252	0.000232	0.837382	4.65e-05	5.30409	43.2622	205.153	226.524	48.8777	164.917	87.9147	71.3347	13.7526	0.595105	177.259
4857_8	8.45073	-105.12	2476	2016	Otto Ridge	DMORB	UF	48.4223	1.34143	17.4464	-	10.1071	0.177143	8.83887	10.978	3.15269	0.0684857	0.134286	60.9201	7.586	0.048	2.364e-05	2.49273e-10	8.51868	0.513075	5e-06	0.702607	1.8e-05	38.045	0.0063	15.5355	0.0027	18.5356	0.0032	2.05251	7.1e-05	0.838143	2.2e-05	5.05183	41.3161	197.635	216.801	46.5829	152.858	83.7872	69.7644	12.9846	0.583357	176.15
4857_9	8.4508	-105.113	2636	2016	Otto Ridge	NMORB	UF	48.9676	1.414	17.2631	-	9.924	0.172	8.15554	11.0256	3.39872	0.1224	0.164	59.4302	-	-	-	-	-	-	-	-	-	-	-	-	-	-	-	-	-	-	-	5.01042	35.111	197.615	197.998	42.7883	116.094	78.2833	74.6131	13.4236	1.26089	216.911
4857_11	8.45107	-105.113	2590	2016	Otto Ridge	NMORB	UF	48.9013	1.414	17.2976	-	9.88	0.182	8.29974	10.8878	3.3384	0.12444	0.14	59.9588	-	-	-	-	-	-	-	-	-	-	-	-	-	-	-	-	-	-	-	-	-	-	-	-	-	-	-	-	-	-
4857_12	8.45142	-105.112	2546	2016	Otto Ridge	NMORB	UF	48.9837	1.37333	17.5037	-	9.74167	0.166667	8.37562	10.9987	3.34533	0.1241	0.161667	60.5145	-	-	-	-	-	-	-	-	-	-	-	-	-	-	-	-	-	-	-	5.09862	35.5103	197.243	200.02	44.0881	123.013	69.8692	72.7012	13.5984	1.24097	219.856
4857_13	8.45154	-105.112	2526	2016	Otto Ridge	NMORB	UF	48.9669	1.37333	17.4394	-	9.85	0.165	8.343	10.8788	3.34013	0.1292	0.16	60.1564	-	-	-	-	-	-	-	-	-	-	-	-	-	-	-	-	-	-	-	-	-	-	-	-	-	-	-	-	-	-
4857_14	8.45182	-105.111	2481	2016	Otto Ridge	NMORB	UF	47.9526	1.346	17.2306	-	9.597	0.162	8.29459	11.5638	3.16368	0.12648	0.141	60.6396	-	-	-	-	-	-	-	-	-	-	-	-	-	-	-	-	-	-	-	4.96975	34.2725	180.903	213.674	41.591	139.918	71.3815	76.4116	16.3971	1.18918	223.535
4857_15	8.45258	-105.11	2432	2016	Otto Ridge	NMORB	UF	48.5395	1.562	16.5689	-	10.431	0.182	7.67865	11.3921	3.39872	0.13974	0.164	56.751	-	-	-	-	-	-	-	-	-	-	-	-	-	-	-	-	-	-	-	5.67623	38.4574	223.201	215.487	43.9096	85.8749	76.2865	83.795	14.8738	1.35239	230.921
4857_16	8.45276	-105.109	2405	2016	Otto Ridge	NMORB	UF	48.7525	1.37286	17.3087	-	9.66714	0.164286	8.28709	11.453	3.25223	0.126771	0.144286	60.4441	-	-	-	-	-	-	-	-	-	-	-	-	-	-	-	-	-	-	-	-	-	-	-	-	-	-	-	-	-	-
4857_17	8.4534	-105.108	2321	2016	Otto Ridge	NMORB	UF	48.4739	1.40455	17.1867	-	9.77909	0.17	8.18663	11.3967	3.28829	0.127036	0.15	59.8758	-	-	-	-	-	-	-	-	-	-	-	-	-	-	-	-	-	-	-	-	-	-	-	-	-	-	-	-	-	-
4857_18	8.45384	-105.106	2265	2016	Otto Ridge	NMORB	UF	48.2521	1.335	17.2834	-	9.625	0.165	8.40274	11.3252	3.20632	0.12342	0.149	60.879	-	-	-	-	-	-	-	-	-	-	-	-	-	-	-	-	-	-	-	4.96971	34.066	187.467	198.135	43.7971	132.171	69.5475	72.4122	13.2543	1.07992	225.184
4858_1	8.48148	-105.212	3066	2016	Sparky	EMORB	UF	49.743	2.45909	16.6054	-	8.95727	0.154545	7.05456	9.64658	3.57193	1.03576	0.460909	58.4007	-	-	-	-	-	-	-	-	-	-	-	-	-	-	-	-	-	-	-	6.83042	27.4217	218.33	151.48	32.9013	87.5282	32.8537	75.3853	19.2531	21.2697	429.734
4858_2	8.47714	-105.212	3087	2016	Sparky	EMORB	UF	49.5852	2.39875	16.5534	-	8.91625	0.1575	7.40441	9.67438	3.5724	0.988125	0.45875	59.6821	-	-	-	-	-	-	-	-	-	-	-	-	-	-	-	-	-	-	-	-	-	-	-	-	-	-	-	-	-	-
4858_3	8.47623	-105.212	3062	2016	Sparky	EMORB	UF	49.4492	2.41222	16.5795	-	8.98556	0.155556	7.42287	9.68783	3.54987	0.983733	0.455556	59.5556	-	-	-	-	7.00299	0.512997	6e-06	0.702984	8.4e-06	38.0907	0.0229	15.5191	0.00705	18.7138	0.00573	2.03542	0.00061	0.82928	0.00012	6.5611	27.5385	224.975	172.667	34.8693	102.173	34.9118	79.0446	19.5106	20.6922	414.143
4858_4	8.47526	-105.212	3055	2016	Sparky	EMORB	UF	50.0324	2.87222	16.0505	-	9.89778	0.17	5.5208	9.05766	4.02711	1.38947	0.654444	49.8562	-	-	-	-	-	-	-	-	-	-	-	-	-	-	-	-	-	-	-	-	-	-	-	-	-	-	-	-	-	-
4858_5	8.47415	-105.212	2967	2016	Sparky	EMORB	UF	49.9235	2.894	16.0949	-	9.945	0.152	5.61247	9.06154	3.98216	1.37904	0.639	50.1489	-	-	-	-	-	-	-	-	-	-	-	-	-	-	-	-	-	-	-	7.15645	28.2436	226.342	99.3113	31.4722	50.758	31.9327	97.1376	23.3284	26.2667	483.965
4858_6	8.47181	-105.213	2900	2016	Sparky	EMORB	UF	50.0437	2.87636	16.2114	-	9.70273	0.163636	5.63691	8.97667	4.00495	1.40296	0.638182	50.874	-	-	-	-	-	-	-	-	-	-	-	-	-	-	-	-	-	-	-	-	-	-	-	-	-	-	-	-	-	-
4858_7	8.47068	-105.213	2887	2016	Sparky	EMORB	UF	49.6591	2.776	16.6095	-	9.538	0.148	5.8916	8.93673	4.0768	1.40148	0.624	52.4051	-	-	-	-	-	-	-	-	-	-	-	-	-	-	-	-	-	-	-	6.82422	24.8612	209.609	104.762	31.6937	61.2571	29.5238	92.0231	22.2198	25.2004	501.602
4858_8	8.46788	-105.212	2890	2016	Sparky	EMORB	UF	49.8934	2.72556	16.5513	-	9.62	0.158889	5.84697	8.85574	4.01787	1.36793	0.627778	52.0018	-	-	-	-	-	-	-	-	-	-	-	-	-	-	-	-	-	-	-	-	-	-	-	-	-	-	-	-	-	-
4858_9	8.46514	-105.211	2756	2016	Sparky	EMORB	UF	49.5566	2.7775	16.5318	-	9.69125	0.1475	5.98816	8.91551	4.017	1.37573	0.61875	52.4131	7.649	0.114	1.5992e-07	1.70029e-12	6.51532	0.512972	4.6e-06	0.702974	9.6e-06	37.9219	0.00475	15.5435	0.00153	18.4794	0.00125	2.05215	0.000128	0.841132	2.9e-05	6.97665	26.2095	210.37	106.268	32.6162	65.7546	29.8604	92.2126	22.8329	25.7098	506.52
4858_10	8.46212	-105.211	2657	2016	Sparky	EMORB	UF	49.7988	2.78	16.6714	-	9.563	0.166	5.83701	8.89579	3.97176	1.3668	0.635	52.1076	-	-	-	-	-	-	-	-	-	-	-	-	-	-	-	-	-	-	-	-	-	-	-	-	-	-	-	-	-	-
4858_11	8.45798	-105.212	2670	2016	Sparky	EMORB	UF	49.4394	2.80875	16.5965	-	9.7475	0.15875	5.8813	8.93298	4.0417	1.377	0.62625	51.8193	-	-	-	-	-	-	-	-	-	-	-	-	-	-	-	-	-	-	-	7.09459	24.4285	220.686	106.91	32.0135	73.8675	33.4901	85.336	22.3255	22.7513	523.606
4858_12	8.45743	-105.212	2634	2016	Sparky	EMORB	UF	50.1441	2.754	16.4298	-	9.707	0.152	5.64646	8.86883	3.98008	1.36374	0.615	50.9054	-	-	-	-	-	-	-	-	-	-	-	-	-	-	-	-	-	-	-	-	-	-	-	-	-	-	-	-	-	-
4858_13	8.45524	-105.211	2601	2016	Sparky	EMORB	UF	50.1034	2.746	16.4745	-	9.697	0.151	5.64028	8.8898	3.96552	1.35558	0.627	50.9037	-	-	-	-	6.49581	0.512971	5.6e-06	0.702962	1.1e-05	37.8899	0.0023	15.5295	0.000902	18.4856	0.000937	2.04974	4.19e-05	0.840099	1.3e-05	7.14061	25.3113	230.078	102.185	32.155	69.5067	34.4855	88.2785	22.8213	23.159	511.291
4858_14	8.4534	-105.211	2588	2016	Sparky	EMORB	UF	50.092	2.78889	16.4125	-	9.67667	0.171111	5.69476	8.86239	3.97049	1.3634	0.624444	51.1964	-	-	-	-	-	-	-	-	-	-	-	-	-	-	-	-	-	-	-	-	-	-	-	-	-	-	-	-	-	-
OS6_A	8.35703	-105.284	3306	2016	Avery	EMORB	USGS	48.8585	2.38159	15.9436	0.0354029	9.94147	0.175616	6.5247	10.0782	3.61295	0.710018	0.408122	53.9149	-	-	-	-	-	-	-	-	-	-	-	-	-	-	-	-	-	-	-	-	-	-	-	-	-	-	-	-	-	-
OS6_B	8.35703	-105.284	3306	2016	Avery	EMORB	USGS	49.2727	2.38378	16.0654	0.0311818	9.96176	0.176233	6.5555	10.0205	3.65593	0.729179	0.402028	53.9812	-	-	-	-	-	-	-	-	-	-	-	-	-	-	-	-	-	-	-	-	-	-	-	-	-	-	-	-	-	-
OS6_C	8.35703	-105.284	3306	2016	Avery	EMORB	USGS	49.0484	2.39113	16.0596	0.0320358	9.98972	0.172037	6.49624	10.0158	3.68879	0.732243	0.399906	53.6859	-	-	-	-	-	-	-	-	-	-	-	-	-	-	-	-	-	-	-	7.48755	31.2183	285.249	180.147	35.1173	84.6591	48.575	107.934	21.0023	18.502	267.454
OS6_D	8.35703	-105.284	3306	2016	Avery	EMORB	USGS	49.0051	2.37715	15.9432	0.026783	10.0822	0.184196	6.74078	10.0024	3.60687	0.691593	0.400987	54.3748	-	-	-	-	8.01735	0.513049	5.4e-06	0.703063	1.3e-05	38.2172	0.00276	15.5358	0.000971	18.6609	0.00113	2.04799	4.52e-05	0.832554	9.33e-06	7.25553	31.6012	272.214	178.111	34.2346	89.1557	46.5744	101.993	19.5038	16.4846	263.094
OS6_E	8.35703	-105.284	3306	2016	Avery	EMORB	USGS	49.0481	2.40486	16.0204	0.0330124	10.0002	0.171399	6.41624	10.0764	3.65248	0.731598	0.404496	53.3517	-	-	-	-	-	-	-	-	-	-	-	-	-	-	-	-	-	-	-	-	-	-	-	-	-	-	-	-	-	-
OS6_F	8.35703	-105.284	3306	2016	Avery	EMORB	USGS	49.1793	1.90438	16.8221	0.0359389	9.10852	0.156995	7.50766	11.1081	3.3083	0.599673	0.319867	59.5018	-	-	-	-	-	-	-	-	-	-	-	-	-	-	-	-	-	-	-	5.60879	33.0367	237.718	210.536	35.3832	91.586	47.3475	82.9939	17.496	13.414	323.862
OS6_G	8.35703	-105.284	3306	2016	Avery	EMORB	USGS	48.9984	2.39213	16.0828	0.0296511	9.9606	0.178419	6.5447	9.99731	3.63662	0.722583	0.399846	53.9432	-	-	-	-	-	-	-	-	-	-	-	-	-	-	-	-	-	-	-	-	-	-	-	-	-	-	-	-	-	-
OS5_A	8.41303	-105.285	2674	2016	Avery	EMORB	UF	49.5192	1.90143	16.6301	-	8.97571	0.158571	7.69999	10.7483	3.29829	0.645514	0.307143	60.4615	-	-	-	-	-	-	-	-	-	-	-	-	-	-	-	-	-	-	-	-	-	-	-	-	-	-	-	-	-	-
OS5_B	8.41303	-105.285	2674	2016	Avery	EMORB	UF	49.5113	1.94	16.6067	-	9.03875	0.1775	7.72886	10.749	3.3007	0.6426	0.325	60.3837	-	-	-	-	-	-	-	-	-	-	-	-	-	-	-	-	-	-	-	-	-	-	-	-	-	-	-	-	-	-
OS5_C	8.41303	-105.285	2674	2016	Avery	EMORB	UF	49.5164	1.94	16.6054	-	9.015	0.16375	7.75075	10.794	3.2227	0.6426	0.31	60.5142	-	-	-	-	-	-	-	-	-	-	-	-	-	-	-	-	-	-	-	5.89647	31.1678	237.969	216.576	33.5045	86.3392	45.677	80.7	18.442	13.0367	311.741
OS5_D	8.41303	-105.285	2674	2016	Avery	EMORB	UF	49.0993	1.93	16.6003	-	8.93	0.185	7.72757	10.7515	3.3098	0.66045	0.3175	60.6689	7.721	0.044	6.52e-06	6.99739e-11	8.21242	0.513059	6e-06	0.703065	1.2e-05	38.1314	0.00279	15.5237	0.00114	18.6176	0.00139	2.04817	5e-05	0.83381	1e-05	5.784	31.0878	235.042	212.852	32.7757	83.6304	42.8655	81.0196	18.2556	12.955	305.438
OS5_E	8.41303	-105.285	2674	2016	Avery	EMORB	UF	49.701	1.9225	16.6308	-	9.0325	0.1675	7.76877	10.7328	3.2708	0.64515	0.31125	60.5233	-	-	-	-	-	-	-	-	-	-	-	-	-	-	-	-	-	-	-	-	-	-	-	-	-	-	-	-	-	-
OS5_F	8.41303	-105.285	2674	2016	Avery	EMORB	UF	49.6743	1.92143	16.5692	-	8.98857	0.161429	7.64554	10.8853	3.31463	0.644057	0.314286	60.2575	-	-	-	-	-	-	-	-	-	-	-	-	-	-	-	-	-	-	-	-	-	-	-	-	-	-	-	-	-	-
OS5_G	8.41303	-105.285	2674	2016	Avery	EMORB	UF	49.3522	1.94	16.5919	-	9.07	0.156667	7.70097	10.8539	3.1304	0.6528	0.323333	60.2145	-	-	-	-	-	-	-	-	-	-	-	-	-	-	-	-	-	-	-	-	-	-	-	-	-	-	-	-	-	-
OS5_H	8.41303	-105.285	2674	2016	Avery	EMORB	UF	48.9636	1.89667	16.6663	-	9.01	0.17	7.6529	10.8971	3.27947	0.646	0.296667	60.2235	-	-	-	-	-	-	-	-	-	-	-	-	-	-	-	-	-	-	-	5.82897	30.876	238.408	216.583	33.3462	87.0983	44.2648	79.6223	18.7376	13.176	299.333
OS4_A	8.42052	-105.311	2695	2016	Avery	EMORB	USGS	48.7839	2.06447	16.2125	0.0367156	9.17758	0.165335	7.34894	11.0801	3.29638	0.539515	0.317469	58.803	-	-	-	-	-	-	-	-	-	-	-	-	-	-	-	-	-	-	-	-	-	-	-	-	-	-	-	-	-	-
OS4_B	8.42052	-105.311	2695	2016	Avery	EMORB	USGS	48.8273	2.07633	16.1655	0.0417475	9.24447	0.156709	7.3244	11.0564	3.28186	0.545767	0.317459	58.5459	-	-	-	-	-	-	-	-	-	-	-	-	-	-	-	-	-	-	-	-	-	-	-	-	-	-	-	-	-	-
OS4_C	8.42052	-105.311	2695	2016	Avery	EMORB	USGS	49.0718	2.09722	16.311	0.0347213	9.24601	0.162119	7.15821	11.1104	3.30695	0.533387	0.330107	57.9837	-	-	-	-	-	-	-	-	-	-	-	-	-	-	-	-	-	-	-	5.93282	33.7694	245.897	231.637	32.5871	84.9271	47.9487	83.9302	17.8055	10.4641	281.386
OS4_D	8.42052	-105.311	2695	2016	Avery	EMORB	USGS	49.0534	2.09137	16.3376	0.0370018	9.25834	0.16079	7.12084	11.09	3.39041	0.548095	0.319856	57.8236	-	-	-	-	-	-	-	-	-	-	-	-	-	-	-	-	-	-	-	-	-	-	-	-	-	-	-	-	-	-
OS4_E	8.42052	-105.311	2695	2016	Avery	EMORB	USGS	48.4847	1.92835	16.4124	0.0364876	9.12871	0.161229	7.75807	11.0912	3.24716	0.583935	0.302497	60.2369	-	-	-	-	7.8613	0.513041	5.1e-06	0.703058	1.5e-05	38.2642	0.00345	15.5475	0.00115	18.6854	0.00112	2.04785	7.72e-05	0.832091	1.7e-05	5.68371	30.6383	234.929	277.226	34.2561	97.4459	45.843	83.5363	17.5158	12.3604	306.104
OS4_F	8.42052	-105.311	2695	2016	Avery	EMORB	USGS	48.7599	2.07572	16.1867	0.0361419	9.18814	0.15869	7.34907	11.0546	3.31643	0.534143	0.320842	58.7756	-	-	-	-	-	-	-	-	-	-	-	-	-	-	-	-	-	-	-	-	-	-	-	-	-	-	-	-	-	-
OS4_H	8.42052	-105.311	2695	2016	Avery	EMORB	USGS	49.1355	2.10585	16.225	0.0367549	9.22888	0.160044	7.34931	11.0913	3.32391	0.532054	0.330689	58.6691	-	-	-	-	-	-	-	-	-	-	-	-	-	-	-	-	-	-	-	-	-	-	-	-	-	-	-	-	-	-
OS4_I	8.42052	-105.311	2695	2016	Avery	EMORB	USGS	48.8381	2.06155	16.3371	0.0381647	9.22494	0.154975	7.32487	11.0755	3.32533	0.54282	0.325606	58.5987	-	-	-	-	-	-	-	-	-	-	-	-	-	-	-	-	-	-	-	-	-	-	-	-	-	-	-	-	-	-
OS4_J	8.42052	-105.311	2695	2016	Avery	EMORB	USGS	48.2886	1.92351	16.4432	0.0371869	9.08286	0.164991	7.62579	11.0618	3.25845	0.573077	0.301312	59.9452	-	-	-	-	-	-	-	-	-	-	-	-	-	-	-	-	-	-	-	-	-	-	-	-	-	-	-	-	-	-
OS4_K	8.42052	-105.311	2695	2016	Avery	EMORB	USGS	49.0365	2.07877	16.337	0.0406255	9.25672	0.166827	7.26754	11.0998	3.31341	0.555183	0.324949	58.3244	-	-	-	-	-	-	-	-	-	-	-	-	-	-	-	-	-	-	-	-	-	-	-	-	-	-	-	-	-	-
OS4_L	8.42052	-105.311	2695	2016	Avery	EMORB	USGS	48.8478	2.08732	16.2011	0.0374494	9.24599	0.16197	7.25592	11.0578	3.29688	0.536455	0.324943	58.3137	-	-	-	-	-	-	-	-	-	-	-	-	-	-	-	-	-	-	-	-	-	-	-	-	-	-	-	-	-	-
4851_1	8.40797	-105.326	2686	2016	Avery	NMORB	UF	47.9013	1.111	16.7028	-	10.544	0.189	9.06812	10.8209	2.57608	0.08976	0.124	60.5215	7.799	0.054	1.067e-05	1.15669e-10	8.60256	0.513079	4e-06	0.702626	9.3e-06	38.0561	0.0257	15.4795	0.00788	18.7582	0.00636	2.02856	0.000704	0.825168	0.000145	4.98628	32.2692	188.816	344.152	45.0471	169.043	81.6713	84.6722	13.9588	0.902351	128.987
4851_3	8.41091	-105.325	2603	2016	Avery	NMORB	UF	48.2679	1.08556	16.5603	-	10.1867	0.188889	9.62363	10.8317	2.56649	0.0997333	0.128889	62.7423	-	-	-	-	-	-	-	-	-	-	-	-	-	-	-	-	-	-	-	4.77133	35.1255	183.275	382.203	44.785	194.774	76.6911	75.5012	13.4108	0.996242	136.448
4851_4	8.41099	-105.321	2605	2016	Avery	NMORB	UF	47.9485	1.107	16.8967	-	10.055	0.18	9.47085	10.9877	2.60104	0.0918	0.128	62.6723	-	-	-	-	-	-	-	-	-	-	-	-	-	-	-	-	-	-	-	-	-	-	-	-	-	-	-	-	-	-
4851_7	8.41106	-105.312	2667	2016	Avery	EMORB	UF	48.7314	1.428	16.6988	-	8.6	0.155	8.38626	11.7266	2.756	0.25092	0.192	63.4801	-	-	-	-	-	-	-	-	-	-	-	-	-	-	-	-	-	-	-	-	-	-	-	-	-	-	-	-	-	-
4851_9	8.40952	-105.31	2467	2016	Avery	NMORB	UF	48.2189	1.107	16.44	-	10.285	0.177	9.77882	10.8619	2.60312	0.10098	0.119	62.8916	-	-	-	-	-	-	-	-	-	-	-	-	-	-	-	-	-	-	-	3.8511	24.8377	156.48	209.788	26.2471	85.4615	49.4437	55.2584	10.9575	2.83448	137.263
4851_11	8.40823	-105.305	2451	2016	Avery	EMORB	UF	48.9174	1.545	16.7526	-	8.738	0.162	8.36772	11.5538	2.79656	0.29784	0.215	63.0587	-	-	-	-	-	-	-	-	-	-	-	-	-	-	-	-	-	-	-	5.33321	31.1546	209.909	276.613	35.3003	115.001	63.9715	77.5811	14.8942	4.02182	189.42
4851_13	8.40574	-105.304	2440	2016	Avery	EMORB	UF	48.537	1.61778	15.9705	-	9.16222	0.158889	8.06948	11.6116	2.82996	0.298067	0.23	61.0886	-	-	-	-	-	-	-	-	-	-	-	-	-	-	-	-	-	-	-	5.59567	33.8815	224.803	295.514	34.9031	88.9741	71.773	81.7959	15.0655	3.99867	185.077
4851_14	8.40638	-105.303	2538	2016	Avery	EMORB	UF	49.1656	1.543	16.7292	-	8.662	0.162	8.39862	11.5628	2.8132	0.27132	0.215	63.3476	-	-	-	-	-	-	-	-	-	-	-	-	-	-	-	-	-	-	-	-	-	-	-	-	-	-	-	-	-	-
4850_1	8.40369	-105.362	2699	2016	Matthew	EMORB	UF	50.9546	1.33778	16.0517	-	8.48333	0.156667	8.51696	11.8346	2.90738	0.239133	0.162222	64.1526	-	-	-	-	9.03171	0.513101	8e-06	0.70263	1.4e-05	37.9751	0.00782	15.5056	0.00238	18.5463	0.00202	2.04759	0.00023	0.83605	5e-05	4.8327	37.6532	216.603	339.472	35.7417	77.9898	71.6971	65.4703	14.5689	2.5674	196.177
4850_3	8.40752	-105.362	2553	2016	Matthew	EMORB	UF	51.0417	1.33889	16.0731	-	8.50667	0.167778	8.48606	11.7226	2.90391	0.2346	0.16	64.0057	-	-	-	-	-	-	-	-	-	-	-	-	-	-	-	-	-	-	-	-	-	-	-	-	-	-	-	-	-	-
4850_4	8.40928	-105.363	2618	2016	Matthew	NMORB	UF	49.3292	1.165	16.1816	-	12.2137	0.2125	7.88722	10.5593	2.8912	0.13515	0.0775	53.5122	-	-	-	-	-	-	-	-	-	-	-	-	-	-	-	-	-	-	-	5.80734	32.5073	219.607	265.157	40.3712	101.151	73.2452	103.988	16.2935	1.88492	108.775
4850_5	8.41184	-105.363	2590	2016	Matthew	NMORB	UF	49.1568	1.06111	16.1441	-	12.3433	0.204444	8.55472	10.1982	2.79182	0.0929333	0.0733333	55.2655	-	-	-	-	8.68059	0.513083	5.1e-06	0.703025	8.6e-06	38.1516	0.011	15.5508	0.00375	18.6348	0.00303	2.04746	0.000289	0.834472	6.32e-05	5.47412	31.111	206.12	288.052	42.5012	133.008	71.8696	101.965	15.44	1.29246	90.7186
4850_7	8.41326	-105.363	2528	2016	Matthew	NMORB	UF	49.2394	1.17444	16.0866	-	12.2144	0.206667	7.81999	10.602	2.9016	0.130333	0.0877778	53.2977	-	-	-	-	-	-	-	-	-	-	-	-	-	-	-	-	-	-	-	5.89471	32.0313	224.062	267.661	40.8797	100.284	74.4023	105.091	16.2801	1.86283	104.41
4850_8	8.41641	-105.366	2532	2016	Matthew	EMORB	UF	48.6621	1.432	16.5831	-	11.556	0.206	8.37184	10.129	2.95568	0.4488	0.17	56.358	7.282	0.107	1.681e-07	1.7015e-12	7.3151	0.513013	5.8e-06	0.70343	1.4e-05	38.3751	0.00578	15.5539	0.00182	18.7835	0.00161	2.04291	0.000152	0.828052	2.99e-05	5.72761	30.4661	234.037	239.153	41.0776	127.852	57.8453	101.423	18.4179	12.0223	202.795
4850_10	8.41668	-105.361	2491	2016	Matthew	NMORB	UF	49.3543	1.1275	16.2666	-	11.7825	0.205	8.16532	10.4919	2.8145	0.09945	0.07875	55.2634	-	-	-	-	-	-	-	-	-	-	-	-	-	-	-	-	-	-	-	-	-	-	-	-	-	-	-	-	-	-
4850_11	8.41693	-105.361	2475	2016	Matthew	NMORB	UF	49.2186	1.12375	16.2946	-	11.785	0.1975	8.11254	10.4395	2.8184	0.103275	0.085	55.0977	-	-	-	-	-	-	-	-	-	-	-	-	-	-	-	-	-	-	-	-	-	-	-	-	-	-	-	-	-	-
4849_3	8.41599	-105.511	2863	2016	Wayne	EMORB	USGS	49.0912	1.49696	16.8353	0.0452782	8.70705	0.15971	8.22016	11.4468	3.10087	0.306305	0.192241	62.7263	-	-	-	-	-	-	-	-	-	-	-	-	-	-	-	-	-	-	-	5.13105	29.9557	212.593	227.163	39.6547	85.352	59.325	74.4461	16.0179	5.5152	214.022
4849_2	8.41634	-105.511	2881	2016	Wayne	EMORB	USGS	48.8709	1.50232	16.7818	0.043837	8.75772	0.157223	8.19488	11.4549	3.17236	0.309536	0.208871	62.5184	-	-	-	-	-	-	-	-	-	-	-	-	-	-	-	-	-	-	-	-	-	-	-	-	-	-	-	-	-	-
4849_4	8.41587	-105.511	2861	2016	Wayne	EMORB	USGS	49.2997	1.54302	16.7066	0.0447222	8.89969	0.16807	7.99404	11.4042	3.13529	0.319463	0.202845	61.5553	-	-	-	-	-	-	-	-	-	-	-	-	-	-	-	-	-	-	-	-	-	-	-	-	-	-	-	-	-	-
4849_6	8.41651	-105.516	2941	2016	Wayne	EMORB	USGS	50.4805	1.86909	15.2833	0.0434692	9.16379	0.16275	6.91343	11.391	3.27506	0.462377	0.268422	57.3524	-	-	-	-	8.23193	0.51306	5.4e-06	0.70282	1.1e-05	38.2107	0.00653	15.5472	0.00206	18.639	0.00173	2.05004	0.00017	0.834121	3.53e-05	5.78942	34.0493	259.529	256.658	37.2634	50.4716	59.8928	86.8816	17.5001	8.12039	240.085
4849_8	8.41492	-105.517	2873	2016	Wayne	EMORB	USGS	50.3396	1.83542	15.4009	0.0444247	9.05276	0.164811	6.99686	11.3798	3.25401	0.451553	0.264983	57.9428	-	-	-	-	-	-	-	-	-	-	-	-	-	-	-	-	-	-	-	-	-	-	-	-	-	-	-	-	-	-
4849_9	8.41154	-105.517	2922	2016	Wayne	NMORB	USGS	50.2883	1.53886	15.3369	0.04198	9.02826	0.159854	7.53601	11.6753	3.21112	0.252376	0.192992	59.8055	-	-	-	-	-	-	-	-	-	-	-	-	-	-	-	-	-	-	-	-	-	-	-	-	-	-	-	-	-	-
4849_11	8.40949	-105.519	2910	2016	Wayne	NMORB	USGS	50.4804	1.53134	15.3841	0.0419892	9.00148	0.169973	7.61287	11.7203	3.22586	0.250589	0.18957	60.1205	-	-	-	-	8.68059	0.513083	4.7e-06	0.702718	1.5e-05	37.9009	0.0755	15.4591	0.0231	18.5524	0.0185	2.04282	0.00204	0.833247	0.000416	5.62012	38.9774	253.988	225.491	40.6474	53.7686	63.5299	79.1951	16.383	2.96507	194.081
4849_12	8.40739	-105.519	2908	2016	Wayne	EMORB	USGS	48.6254	1.73423	16.6731	0.0417339	8.94337	0.161785	8.35149	10.9305	3.13946	0.511652	0.257792	62.4704	-	-	-	-	-	-	-	-	-	-	-	-	-	-	-	-	-	-	-	-	-	-	-	-	-	-	-	-	-	-
4849_13	8.4073	-105.519	2894	2016	Wayne	EMORB	USGS	48.5443	1.77209	16.8022	0.0412493	8.90035	0.155864	7.735	11.0561	3.1756	0.522349	0.253883	60.7711	-	-	-	-	-	-	-	-	-	-	-	-	-	-	-	-	-	-	-	-	-	-	-	-	-	-	-	-	-	-
4849_14	8.40649	-105.52	2878	2016	Wayne	EMORB	UF	48.5214	1.82333	16.805	-	8.87167	0.16	7.53273	11.0503	3.30893	0.5661	0.296667	60.215	-	-	-	-	8.27094	0.513062	7e-06	-	-	38.2208	0.0039	15.553	0.00134	18.6545	0.00129	2.04881	8e-05	0.83374	2e-05	5.4531	30.5328	221.985	293.716	33.7725	86.9044	51.7915	83.5511	18.171	11.1082	307.983
4849_15	8.40512	-105.521	2822	2016	Wayne	EMORB	USGS	48.5894	1.72391	16.6134	0.0443112	8.8757	0.154836	8.24092	10.9545	3.16014	0.498604	0.24531	62.3359	-	-	-	-	-	-	-	-	-	-	-	-	-	-	-	-	-	-	-	-	-	-	-	-	-	-	-	-	-	-
4849_18	8.40354	-105.519	2775	2016	Wayne	EMORB	USGS	48.5281	1.73602	16.4859	0.046567	8.90306	0.151784	8.43466	10.8071	3.15187	0.516155	0.251849	62.808	-	-	-	-	-	-	-	-	-	-	-	-	-	-	-	-	-	-	-	5.67008	31.4882	210.167	275.939	35.8127	122.132	50.2743	78.295	17.3399	10.4267	297.604
4849_20	8.40283	-105.519	2718	2016	Wayne	EMORB	UF	48.4276	1.76	16.4345	-	8.90333	0.15	8.30695	10.8988	3.21707	0.5508	0.278333	62.4502	7.784	0.052	3.553e-06	3.84426e-11	7.82228	0.513039	5.4e-06	0.703024	1.6e-05	38.1901	0.00496	15.5405	0.00201	18.6322	0.00228	2.04975	4.59e-05	0.834092	1.4e-05	5.14913	31.298	213.822	278.028	36.057	117.657	51.0418	76.6209	17.5419	10.6117	300.227
OS3_A	8.4283	-105.52	3041	2016	Wayne	NMORB	USGS	49.8804	1.5764	15.5096	-	9.18	-	7.55251	11.7477	3.20773	0.242193	0.190361	59.457	-	-	-	-	-	-	-	-	-	-	-	-	-	-	-	-	-	-	-	5.00125	35.795	241.745	244.986	36.672	57.055	64.3785	74.3914	14.0711	2.37103	181.586
4847_1	8.38207	-105.627	3209	2016	Max	DMORB	USGS	48.23	1.39083	17.4257	-	7.98602	-	8.43814	11.5193	3.47435	0.0842997	0.167547	65.3193	-	-	-	-	-	-	-	-	-	-	-	-	-	-	-	-	-	-	-	-	-	-	-	-	-	-	-	-	-	-
4847_2	8.38232	-105.628	3171	2016	Max	DMORB	USGS	48.6738	1.37447	17.5462	-	7.87497	-	8.53003	11.5656	3.54236	0.0813687	0.163447	65.8798	-	-	-	-	-	-	-	-	-	-	-	-	-	-	-	-	-	-	-	4.70501	29.5523	179.795	280.682	36.4968	122.05	65.6463	58.7767	12.6473	0.683923	190.869
4847_7	8.38434	-105.634	3051	2016	Max	DMORB	USGS	49.0326	1.43492	17.4743	-	7.83571	-	8.46115	11.5627	3.53396	0.076884	0.188309	65.8098	-	-	-	-	-	-	-	-	-	-	-	-	-	-	-	-	-	-	-	-	-	-	-	-	-	-	-	-	-	-
4847_8	8.38434	-105.635	3007	2016	Max	DMORB	USGS	48.3256	1.34607	17.4096	-	7.87792	-	8.85606	11.5181	3.48466	0.0841104	0.156682	66.7095	8.137	0.049	1.487e-05	1.68186e-10	11.1775	0.513211	6e-06	0.702333	8.1e-06	37.3254	0.00878	15.4355	0.00288	17.9115	0.00238	2.084	0.00023	0.86179	5e-05	4.7276	26.7406	182.542	304.608	37.9198	137.375	64	63.6037	12.9791	0.6678	185.948
4847_9	8.38445	-105.636	2933	2016	Max	NMORB	USGS	49.9814	1.3194	15.0137	-	9.27823	-	7.90298	12.3399	2.64896	0.175784	0.148328	60.291	-	-	-	-	-	-	-	-	-	-	-	-	-	-	-	-	-	-	-	-	-	-	-	-	-	-	-	-	-	-
4847_10	8.38464	-105.637	2851	2016	Max	NMORB	USGS	50.6462	1.56888	14.6094	-	10.305	-	6.87138	11.6026	2.92502	0.228344	0.17433	54.3086	-	-	-	-	-	-	-	-	-	-	-	-	-	-	-	-	-	-	-	-	-	-	-	-	-	-	-	-	-	-
4847_11	8.38483	-105.64	2787	2016	Max	NMORB	USGS	50.8062	1.74389	14.3493	-	10.877	-	6.65265	11.175	3.1123	0.259203	0.201113	52.1588	-	-	-	-	-	-	-	-	-	-	-	-	-	-	-	-	-	-	-	6.36103	36.7717	300.214	55.2065	39.6451	31.2687	66.4312	97.6971	14.9102	2.94253	138.499
4847_13	8.38752	-105.643	2714	2016	Max	NMORB	USGS	50.0572	1.529	14.5213	-	10.2295	-	7.12162	11.5685	2.92963	0.226074	0.178179	55.3765	-	-	-	-	-	-	-	-	-	-	-	-	-	-	-	-	-	-	-	-	-	-	-	-	-	-	-	-	-	-
4847_14	8.38925	-105.645	2676	2016	Max	NMORB	USGS	50.3326	1.49865	14.6402	-	10.2004	-	7.21848	11.55	2.93538	0.21579	0.172867	55.7805	-	-	-	-	-	-	-	-	-	-	-	-	-	-	-	-	-	-	-	5.51643	39.0178	273.952	81.8659	38.5614	32.1183	65.8036	81.4764	13.795	2.31773	134.798
4847_15	8.3873	-105.648	2658	2016	Max	NMORB	USGS	49.9008	1.31814	16.0295	-	8.52646	-	8.22457	12.1979	2.9017	0.216637	0.161714	63.2275	8.017	0.046	1.924e-05	2.14403e-10	9.10974	0.513105	3.4e-06	0.702626	1.4e-05	38.0794	0.0127	15.522	0.00404	18.5679	0.0034	2.05056	0.000318	0.835855	6.68e-05	4.3338	35.4387	217.329	339.794	36.0219	76.4453	70.9057	67.5242	12.7958	1.84371	175.271
4847_16	8.38629	-105.649	2575	2016	Max	NMORB	USGS	49.7791	1.31458	16.0589	-	8.49505	-	8.24251	12.2048	2.89305	0.204545	0.160548	63.3639	-	-	-	-	-	-	-	-	-	-	-	-	-	-	-	-	-	-	-	-	-	-	-	-	-	-	-	-	-	-
4848_1	8.37327	-105.748	2168	2016	Ivy	EMORB	UF	49.858	2.06333	16.1114	-	8.46	0.148333	7.1276	10.6076	2.91373	0.6715	0.328333	60.0287	-	-	-	-	7.74426	0.513035	6.5e-06	0.70295	9.3e-06	38.2836	0.00324	15.5453	0.00121	18.7198	0.00153	2.04508	4.66e-05	0.830392	1.4e-05	5.8416	32.0794	233.065	248.623	35.3723	84.737	69.2295	80.8885	18.5552	12.6635	262.694
4848_5	8.36842	-105.744	2332	2016	Ivy	EMORB	USGS	49.2483	1.84635	16.7001	0.0364624	8.34864	0.149503	7.6519	10.9186	3.08895	0.556552	0.268649	62.0316	-	-	-	-	8.01735	0.513049	9e-06	0.702893	9.8e-06	38.1908	0.00648	15.5305	0.0022	18.6846	0.00196	2.044	0.00014	0.83121	3e-05	5.0831	40.9897	193.814	252.006	32.5067	101.073	60.0368	53.7128	16.815	9.4432	272.5
4848_6	8.36868	-105.743	2350	2016	Ivy	EMORB	USGS	49.3182	2.0914	15.9248	0.0385062	8.84055	0.159449	6.94468	10.9181	3.19266	0.630748	0.287223	58.338	-	-	-	-	-	-	-	-	-	-	-	-	-	-	-	-	-	-	-	6.05745	33.15	247.155	270.758	34.7332	65.4787	70.5846	85.0913	18.211	12.0091	255.702
4848_7	8.3676	-105.741	2339	2016	Ivy	EMORB	USGS	49.192	1.89663	16.5721	0.0376922	8.43514	0.150073	7.551	10.9784	3.15231	0.574543	0.268766	61.4747	8.011	0.066	2.853e-07	3.1769e-12	8.23193	0.51306	6.1e-06	0.702895	1.4e-05	38.2605	0.00368	15.5391	0.0014	18.71	0.00159	2.04485	4.89e-05	0.830494	1.64e-05	5.34629	28.5726	213.45	244.103	34.9123	97.4285	63.5564	78.4162	16.7669	10.3931	249.889
4848_8	8.36773	-105.741	2312	2016	Ivy	EMORB	UF	49.8339	1.932	16.1629	-	8.516	0.146	7.45308	10.798	2.97648	0.61608	0.308	60.9382	-	-	-	-	-	-	-	-	-	-	-	-	-	-	-	-	-	-	-	-	-	-	-	-	-	-	-	-	-	-
4848_10	8.36929	-105.738	2300	2016	Ivy	EMORB	UF	49.7215	1.945	16.1884	-	8.37917	0.144167	7.59797	10.6866	2.9016	0.6069	0.308333	61.7788	-	-	-	-	-	-	-	-	-	-	-	-	-	-	-	-	-	-	-	6.00781	30.8885	227.461	233.811	35.4589	117.597	64.9505	72.1959	19.3142	10.5298	272.935
4848_11	8.36929	-105.738	2300	2016	Ivy	EMORB	UF	49.8329	1.94833	16.3432	-	8.34667	0.145	7.55333	10.6342	2.91027	0.6188	0.3	61.7314	-	-	-	-	-	-	-	-	-	-	-	-	-	-	-	-	-	-	-	-	-	-	-	-	-	-	-	-	-	-
4848_14	8.37375	-105.737	2251	2016	Ivy	EMORB	UF	50.4347	2.47875	13.7812	-	11.9413	0.21125	5.44484	9.55955	3.8753	0.488325	0.31625	44.8361	2.194	0.244	7.417e-09	2.26193e-14	8.95369	0.513097	3.3e-06	0.70279	7.4e-06	38.0878	0.0334	15.5092	0.0102	18.6047	0.0082	2.0472	0.000894	0.833616	0.00018	8.40891	36.0049	324.278	21.3992	40.0245	17.1399	58.6856	118.877	18.5412	7.57308	171.065
4848_15	8.3743	-105.737	2193	2016	Ivy	EMORB	UF	50.685	2.51	13.7924	-	12.0243	0.21	5.50461	9.5501	3.43646	0.483771	0.321429	44.9348	-	-	-	-	-	-	-	-	-	-	-	-	-	-	-	-	-	-	-	-	-	-	-	-	-	-	-	-	-	-
4848_19	8.37695	-105.734	2180	2016	Ivy	EMORB	UF	50.8593	2.3775	14.2075	-	10.5262	0.18625	5.69848	10.0251	3.6322	0.61455	0.3425	49.1092	-	-	-	-	-	-	-	-	-	-	-	-	-	-	-	-	-	-	-	7.45636	38.4192	301.708	27.7479	36.9627	22.3803	65.4931	100.427	18.8044	10.4303	216.31
[truncated: 24 more columns]
