# Supplementary material for: Deeply Recycled Origins of Mantle Heterogeneity at the Northern East Pacific Rise
Source: Research Square preprint supplement (doi:10.21203/rs.3.rs-6173319/v1), 2025-06-20
Supplement: Supplementary file 2 [file 4dbcb30d44c065b5d10a7f19.xlsx]

## Sheet: SMB_GLOSS_Mixing_calculations
	Pb										Sr			Nd
SMB (ppm)	0.09			0.09			0.09			81	81	81	7.5	7.5	7.5
GLOSS avg (ppm)	20			7.36			25.5			327	289	251	27	299	8
		GLOSS avg			Low end			High end		GLOSS avg	Low end	High end	GLOSS avg	Low end	High end
	206Pb/204Pb	207Pb/204Pb	208Pb/204Pb	206Pb/204Pb	207Pb/204Pb	208Pb/204Pb	206Pb/204Pb	207Pb/204Pb	208Pb/204Pb	87Sr/86Sr	87Sr/86Sr	87Sr/86Sr	143Nd/144Nd	143Nd/144Nd	143Nd/144Nd
100% AOC	18.54	15.45	37.7	18.54	15.45	37.7	18.54	15.45	37.7	0.7028	0.7028	0.7028	0.5131	0.5131	0.5131
0.99	18.798	15.6043	38.5295	18.5034	15.4794	37.9108	19.1165	15.6864	38.9146	0.703368	0.702907	0.703775	0.513068	0.512882	0.513095
0.98	18.8456	15.6327	38.6824	18.4893	15.4906	37.9914	19.2033	15.722	39.0973	0.703904	0.703009	0.704711	0.513037	0.512759	0.513091
0.95	18.8836	15.6554	38.8046	18.4743	15.5027	38.0781	19.2691	15.749	39.236	0.705341	0.703287	0.707305	0.512953	0.512585	0.513077
0.9	18.8985	15.6643	38.8523	18.467	15.5086	38.1198	19.294	15.7592	39.2885	0.70729	0.703674	0.711029	0.512837	0.51248	0.513054
0% AOC (100% GLOSS)	18.913	15.673	38.899	18.459	15.515	38.166	19.318	15.769	39.339	0.7173	0.70588	0.73493	0.51218	0.51234	0.51267
								1% sediment 99% SMB propagating the full range of average trench isotopes
